# Supplementary material for: Simple rules can guide whether land- or ocean-based conservation will best benefit marine ecosystems
Source: PLoS Biol. 2017 Sep 6;15(9):e2001886. doi: 10.1371/journal.pbio.2001886 (PMC5587113; doi:10.1371/journal.pbio.2001886)
Supplement: S2 Data — (XLS) [file pbio.2001886.s013.xls]

## Sheet: Sheet1
	Decline 0	Decline 1	Decline 2	Decline 3	Decline 4	Decline 5	Decline 6	Decline 7
Expansion 0	2	2	2	2	1	1	1	1
Expansion 1	2	2	2	2	1	1	1	1
Expansion 2	4	2	2	2	1	1	1	1
Expansion 3	4	4	2	2	1	1	1	1
Expansion 4	4	4	4	2	1	1	1	1
Expansion 5	4	4	4	4	1	1	1	1
Expansion 6	4	4	4	4	4	1	1	1
Expansion 7	4	4	4	4	4	4	1	1
Expansion 8	4	4	4	4	4	4	4	1
Expansion 9	4	4	4	4	4	4	4	4
Expansion 10	4	4	4	4	4	4	4	4
