# Supplementary material for: Simple rules can guide whether land- or ocean-based conservation will best benefit marine ecosystems
Source: PLoS Biol. 2017 Sep 6;15(9):e2001886. doi: 10.1371/journal.pbio.2001886 (PMC5587113; doi:10.1371/journal.pbio.2001886)
Supplement: S7 Data — (XLS) [file pbio.2001886.s018.xls]

## Sheet: Sheet1
		Rate of decline in ocean (% yr-1)
Rate of expansion in ocean (% yr-1)		0	1	2	3	4	5	6	7		Legend
	0	4	4	4	4	4	4	4	4		1 = Protect Ocean
	1	4	4	4	4	4	4	4	4		2= Restore Ocean
	2	4	4	4	4	4	4	4	4		3 = Protect Land
	3	4	4	4	4	4	4	4	4		4 = Restore Land
	4	4	4	4	4	4	4	4	4
	5	4	4	4	4	4	4	4	4
	6	4	4	4	4	4	4	4	4
	7	4	4	4	4	4	4	4	4
	8	4	4	4	4	4	4	4	4
	9	4	4	4	4	4	4	4	4
	10	4	4	4	4	4	4	4	4
