# Supplementary material for: Simple rules can guide whether land- or ocean-based conservation will best benefit marine ecosystems
Source: PLoS Biol. 2017 Sep 6;15(9):e2001886. doi: 10.1371/journal.pbio.2001886 (PMC5587113; doi:10.1371/journal.pbio.2001886)
Supplement: S8 Data — (XLS) [file pbio.2001886.s019.xls]

## Sheet: Sheet1
Time	Sediment - Protect Ocean	Sediment - Restore Ocean	Sediment - Protect Land	Sediment - Restore Land	Suitable - Protect Ocean	Suitable - Restore Ocean	Suitable - Protect Land	Suitable - Restore Land	Protected - Protect Ocean	Protected - Restore Ocean	Protected- Protect Land	Protected - Restore Land	Intact - Protect Ocean	Intact - Restore Ocean	Intact - Protect Land	Intact - Restore Land
0.1	1	1	1	1	1	1	1	1	1	1	1	1	1	1	1	1
0.2	1	1	1	1	1	1	1	1	2.90837	1	1	1	1	1	1	1
0.3	1	1	1	1	1	1	1	1	4.81667	1.0075	1	1	1	1.00001	1	1
0.4	1	1	0.999986	0.999981	1	1	1.00001	1.00001	6.72492	1.02225	1.00001	1.00001	1	1.00003	1.00001	1.00001
0.5	1	1	0.999958	0.999942	1	1	1.00002	1.00002	8.63311	1.04402	1.00002	1.00002	1.00001	1.00005	1.00002	1.00002
0.6	1	1	0.999916	0.999885	1	1	1.00003	1.00005	10.5412	1.07256	1.00003	1.00005	1.00001	1.00009	1.00003	1.00005
0.7	1	1	0.99986	0.999808	1	1	1.00006	1.00008	12.4493	1.10766	1.00006	1.00008	1.00002	1.00013	1.00006	1.00008
0.8	1	1	0.99979	0.999714	1	1	1.00008	1.00011	14.3574	1.1491	1.00008	1.00011	1.00002	1.00018	1.00008	1.00011
0.9	1	1	0.999706	0.999601	1	1	1.00012	1.00016	16.2654	1.18917	1.00012	1.00014	1.00003	1.00022	1.00012	1.00014
1	1	1	0.999623	0.999469	1	1	1.00015	1.00021	18.1733	1.22792	1.00015	1.00017	1.00004	1.00027	1.00015	1.00017
1.1	1	1	0.99954	0.99932	1	1	1.00018	1.00027	20.0812	1.27289	1.00018	1.00021	1.00005	1.00032	1.00018	1.00021
1.2	1	1	0.999457	0.999153	1	1	1.00021	1.00033	20.081	1.31638	1.00021	1.00024	1.00006	1.00038	1.00021	1.00024
1.3	1	1	0.999374	0.998968	1	1	1.00025	1.00041	20.0808	1.35842	1.00025	1.00027	1.00007	1.00043	1.00025	1.00027
1.4	1	1	0.999291	0.998766	1	1	1.00028	1.00049	20.0806	1.39908	1.00028	1.0003	1.00008	1.00047	1.00028	1.0003
1.5	1	1	0.999208	0.998546	1	1	1.00031	1.00057	20.0804	1.4384	1.00031	1.00034	1.0001	1.00052	1.00031	1.00034
1.6	1	1	0.999126	0.99831	1	1	1.00034	1.00067	20.0802	1.47642	1.00034	1.00037	1.00011	1.00057	1.00034	1.00037
1.7	1	1	0.999043	0.998056	1	1	1.00038	1.00077	20.08	1.52068	1.00038	1.0004	1.00012	1.00062	1.00038	1.0004
1.8	1	1	0.99896	0.997786	1	1	1.00041	1.00087	20.0798	1.56348	1.00041	1.00044	1.00013	1.00067	1.00041	1.00044
1.9	1	1	0.998878	0.997499	1	1	1.00044	1.00099	20.0796	1.60486	1.00044	1.00047	1.00014	1.00072	1.00044	1.00047
2	1	1	0.998795	0.997196	1	1	1.00048	1.00111	20.0795	1.64488	1.00048	1.0005	1.00015	1.00077	1.00048	1.0005
2.1	1	1	0.998713	0.996876	1	1	1.00051	1.00123	20.0793	1.68358	1.00051	1.00053	1.00016	1.00081	1.00051	1.00053
2.2	1	1	0.998631	0.99654	1	1	1.00054	1.00136	20.0791	1.7285	1.00054	1.00057	1.00017	1.00087	1.00054	1.00057
2.3	1	1	0.998549	0.996189	1	1	1.00057	1.0015	20.079	1.77194	1.00057	1.0006	1.00019	1.00092	1.00057	1.0006
2.4	1	1	0.998466	0.995822	1	1	1.00061	1.00165	20.0788	1.81394	1.00061	1.00063	1.0002	1.00097	1.00061	1.00063
2.5	1	1	0.998384	0.995439	1	1	1.00064	1.0018	20.0787	1.85456	1.00064	1.00066	1.00021	1.00101	1.00064	1.00066
2.6	1	1	0.998302	0.995041	1	1	1.00067	1.00196	20.0786	1.89383	1.00067	1.0007	1.00022	1.00106	1.00067	1.0007
2.7	1	1	0.99822	0.994627	1	1	1.0007	1.00212	20.0784	1.93181	1.0007	1.00073	1.00023	1.00111	1.0007	1.00073
2.8	1	1	0.998139	0.994199	1	1	1.00073	1.00229	20.0783	1.97603	1.00073	1.00076	1.00024	1.00116	1.00073	1.00076
2.9	1	1	0.998057	0.993755	1	1	1.00077	1.00247	20.0782	2.01879	1.00077	1.00079	1.00025	1.00121	1.00077	1.00079
3	1	1	0.997975	0.993297	1	1	1.0008	1.00265	20.078	2.06014	1.0008	1.00083	1.00026	1.00126	1.0008	1.00083
3.1	1	1	0.997893	0.992824	1	1	1.00083	1.00283	20.0779	2.10013	1.00083	1.00086	1.00028	1.00131	1.00083	1.00086
3.2	1	1	0.997812	0.992336	1	1	1.00086	1.00303	20.0778	2.13879	1.00086	1.00089	1.00029	1.00135	1.00086	1.00089
3.3	1	1	0.99773	0.991835	1	1	1.0009	1.00323	20.0777	2.18368	1.0009	1.00092	1.0003	1.00141	1.0009	1.00092
3.4	1	1	0.997649	0.991319	1	1	1.00093	1.00343	20.0776	2.22708	1.00093	1.00095	1.00031	1.00146	1.00093	1.00095
3.5	1	1	0.997568	0.990789	1	1	1.00096	1.00364	20.0775	2.26905	1.00096	1.00099	1.00032	1.00151	1.00096	1.00099
3.6	1	1	0.997486	0.990245	1	1	1.00099	1.00386	20.0774	2.30964	1.00099	1.00102	1.00033	1.00155	1.00099	1.00102
3.7	1	1	0.997405	0.989687	1	1	1.00103	1.00408	20.0773	2.34889	1.00103	1.00105	1.00034	1.0016	1.00103	1.00105
3.8	1	1	0.997324	0.989116	1	1	1.00106	1.0043	20.0772	2.38684	1.00106	1.00108	1.00035	1.00165	1.00106	1.00108
3.9	1	1	0.997243	0.988531	1	1	1.00109	1.00453	20.0771	2.43103	1.00109	1.00112	1.00036	1.0017	1.00109	1.00112
4	1	1	0.997162	0.987933	1	1	1.00112	1.00477	20.077	2.47377	1.00112	1.00115	1.00038	1.00175	1.00112	1.00115
4.1	1	1	0.997081	0.987321	1	1	1.00115	1.00501	20.0769	2.5151	1.00115	1.00118	1.00039	1.0018	1.00115	1.00118
4.2	1	1	0.997	0.986697	1	1	1.00119	1.00526	20.0768	2.55506	1.00119	1.00121	1.0004	1.00185	1.00119	1.00121
4.3	1	1	0.99692	0.986059	1	1	1.00122	1.00551	20.0768	2.5937	1.00122	1.00124	1.00041	1.00189	1.00122	1.00124
4.4	1	1	0.996839	0.985409	1	1	1.00125	1.00577	20.0767	2.63857	1.00125	1.00128	1.00042	1.00194	1.00125	1.00128
4.5	1	1	0.996758	0.984746	1	1	1.00128	1.00603	20.0766	2.68195	1.00128	1.00131	1.00043	1.002	1.00128	1.00131
4.6	1	1	0.996678	0.984071	1	1	1.00131	1.0063	20.0765	2.7239	1.00131	1.00134	1.00044	1.00204	1.00131	1.00134
4.7	1	1	0.996597	0.983383	1	1	1.00135	1.00657	20.0765	2.76447	1.00135	1.00137	1.00045	1.00209	1.00135	1.00137
4.8	1	1	0.996517	0.982683	1	1	1.00138	1.00685	20.0764	2.8037	1.00138	1.0014	1.00046	1.00214	1.00138	1.0014
4.9	1	1	0.996437	0.981971	1	1	1.00141	1.00714	20.0763	2.84163	1.00141	1.00144	1.00048	1.00218	1.00141	1.00144
5	1	1	0.996356	0.981247	1	1	1.00144	1.00742	20.0763	2.88581	1.00144	1.00147	1.00049	1.00224	1.00144	1.00147
5.1	1	1	0.996276	0.980511	1	1	1.00147	1.00771	20.0762	2.92853	1.00147	1.0015	1.0005	1.00229	1.00147	1.0015
5.2	1	1	0.996196	0.979763	1	1	1.00151	1.00801	20.0762	2.96984	1.00151	1.00153	1.00051	1.00234	1.00151	1.00153
5.3	1	1	0.996116	0.979003	1	1	1.00154	1.00831	20.0761	3.00978	1.00154	1.00156	1.00052	1.00238	1.00154	1.00156
5.4	1	1	0.996036	0.978232	1	1	1.00157	1.00862	20.076	3.04841	1.00157	1.0016	1.00053	1.00243	1.00157	1.0016
5.5	1	1	0.995956	0.97745	1	1	1.0016	1.00893	20.076	3.09326	1.0016	1.00163	1.00054	1.00248	1.0016	1.00163
5.6	1	1	0.995877	0.976656	1	1	1.00163	1.00925	20.0759	3.13663	1.00163	1.00166	1.00055	1.00253	1.00163	1.00166
5.7	1	1	0.995797	0.975851	1	1	1.00166	1.00957	20.0759	3.17857	1.00166	1.00169	1.00056	1.00258	1.00166	1.00169
5.8	1	1	0.995717	0.975035	1	1	1.0017	1.00989	20.0758	3.21912	1.0017	1.00172	1.00057	1.00263	1.0017	1.00172
5.9	1	1	0.995638	0.974208	1	1	1.00173	1.01022	20.0758	3.25834	1.00173	1.00175	1.00059	1.00268	1.00173	1.00175
6	1	1	0.995558	0.97337	1	1	1.00176	1.01055	20.0757	3.29626	1.00176	1.00179	1.0006	1.00272	1.00176	1.00179
6.1	1	1	0.995479	0.972521	1	1	1.00179	1.01089	20.0757	3.34043	1.00179	1.00182	1.00061	1.00277	1.00179	1.00182
6.2	1	1	0.995399	0.971662	1	1	1.00182	1.01123	20.0757	3.38313	1.00182	1.00185	1.00062	1.00282	1.00182	1.00185
6.3	1	1	0.99532	0.970792	1	1	1.00186	1.01158	20.0756	3.42443	1.00186	1.00188	1.00063	1.00287	1.00186	1.00188
6.4	1	1	0.995241	0.969912	1	1	1.00189	1.01193	20.0756	3.46437	1.00189	1.00191	1.00064	1.00292	1.00189	1.00191
6.5	1	1	0.995161	0.969022	1	1	1.00192	1.01228	20.0755	3.50299	1.00192	1.00194	1.00065	1.00297	1.00192	1.00194
6.6	1	1	0.995082	0.968121	1	1	1.00195	1.01264	20.0755	3.54783	1.00195	1.00198	1.00066	1.00302	1.00195	1.00198
6.7	1	1	0.995003	0.967211	1	1	1.00198	1.013	20.0755	3.59119	1.00198	1.00201	1.00067	1.00307	1.00198	1.00201
6.8	1	1	0.994924	0.96629	1	1	1.00201	1.01337	20.0754	3.63312	1.00201	1.00204	1.00068	1.00312	1.00201	1.00204
6.9	1	1	0.994846	0.96536	1	1	1.00204	1.01374	20.0754	3.67366	1.00204	1.00207	1.00069	1.00317	1.00204	1.00207
7	1	1	0.994767	0.964419	1	1	1.00208	1.01411	20.0754	3.71287	1.00208	1.0021	1.00071	1.00321	1.00208	1.0021
7.1	1	1	0.994688	0.963469	1	1	1.00211	1.01449	20.0753	3.75078	1.00211	1.00213	1.00072	1.00326	1.00211	1.00213
7.2	1	1	0.994609	0.96251	1	1	1.00214	1.01488	20.0753	3.79494	1.00214	1.00216	1.00073	1.00331	1.00214	1.00216
7.3	1	1	0.994531	0.961541	1	1	1.00217	1.01526	20.0753	3.83764	1.00217	1.0022	1.00074	1.00336	1.00217	1.0022
7.4	1	1	0.994452	0.960562	1	1	1.0022	1.01565	20.0753	3.87894	1.0022	1.00223	1.00075	1.00341	1.0022	1.00223
7.5	1	1	0.994374	0.959575	1	1	1.00223	1.01605	20.0752	3.91887	1.00223	1.00226	1.00076	1.00346	1.00223	1.00226
7.6	1	1	0.994295	0.958578	1	1	1.00226	1.01644	20.0752	3.95748	1.00226	1.00229	1.00077	1.0035	1.00226	1.00229
7.7	1	1	0.994217	0.957572	1	1	1.0023	1.01684	20.0752	4.00231	1.0023	1.00232	1.00078	1.00355	1.0023	1.00232
7.8	1	1	0.994139	0.956557	1	1	1.00233	1.01725	20.0752	4.04566	1.00233	1.00235	1.00079	1.0036	1.00233	1.00235
7.9	1	1	0.994061	0.955534	1	1	1.00236	1.01766	20.0751	4.08759	1.00236	1.00238	1.0008	1.00365	1.00236	1.00238
8	1	1	0.993983	0.954501	1	1	1.00239	1.01807	20.0751	4.12813	1.00239	1.00242	1.00081	1.0037	1.00239	1.00242
8.1	1	1	0.993905	0.95346	1	1	1.00242	1.01848	20.0751	4.16733	1.00242	1.00245	1.00082	1.00375	1.00242	1.00245
8.2	1	1	0.993827	0.95241	1	1	1.00245	1.0189	20.0751	4.20524	1.00245	1.00248	1.00084	1.00379	1.00245	1.00248
8.3	1	1	0.993749	0.951351	1	1	1.00248	1.01933	20.075	4.24939	1.00248	1.00251	1.00085	1.00384	1.00248	1.00251
8.4	1	1	0.993671	0.950285	1	1	1.00251	1.01975	20.075	4.29209	1.00251	1.00254	1.00086	1.00389	1.00251	1.00254
8.5	1	1	0.993593	0.949209	1	1	1.00255	1.02018	20.075	4.33338	1.00255	1.00257	1.00087	1.00394	1.00255	1.00257
8.6	1	1	0.993515	0.948126	1	1	1.00258	1.02061	20.075	4.3733	1.00258	1.0026	1.00088	1.00399	1.00258	1.0026
8.7	1	1	0.993438	0.947034	1	1	1.00261	1.02105	20.075	4.41191	1.00261	1.00263	1.00089	1.00404	1.00261	1.00263
8.8	1	1	0.99336	0.945935	1	1	1.00264	1.02149	20.0749	4.45674	1.00264	1.00266	1.0009	1.00409	1.00264	1.00266
8.9	1	1	0.993283	0.944827	1	1	1.00267	1.02193	20.0749	4.50009	1.00267	1.0027	1.00091	1.00414	1.00267	1.0027
9	1	1	0.993205	0.943711	1	1	1.0027	1.02238	20.0749	4.54201	1.0027	1.00273	1.00092	1.00419	1.0027	1.00273
9.1	1	1	0.993128	0.942588	1	1	1.00273	1.02283	20.0749	4.58254	1.00273	1.00276	1.00093	1.00424	1.00273	1.00276
9.2	1	1	0.993051	0.941456	1	1	1.00276	1.02328	20.0749	4.62174	1.00276	1.00279	1.00094	1.00428	1.00276	1.00279
9.3	1	1	0.992974	0.940317	1	1	1.00279	1.02374	20.0749	4.65965	1.00279	1.00282	1.00095	1.00433	1.00279	1.00282
9.4	1	1	0.992896	0.939171	1	1	1.00283	1.02419	20.0749	4.7038	1.00283	1.00285	1.00096	1.00438	1.00283	1.00285
9.5	1	1	0.992819	0.938017	1	1	1.00286	1.02466	20.0748	4.74649	1.00286	1.00288	1.00098	1.00443	1.00286	1.00288
9.6	1	1	0.992742	0.936855	1	1	1.00289	1.02512	20.0748	4.78777	1.00289	1.00291	1.00099	1.00448	1.00289	1.00291
9.7	1	1	0.992665	0.935686	1	1	1.00292	1.02559	20.0748	4.8277	1.00292	1.00294	1.001	1.00452	1.00292	1.00294
9.8	1	1	0.992589	0.93451	1	1	1.00295	1.02606	20.0748	4.8663	1.00295	1.00297	1.00101	1.00457	1.00295	1.00297
9.9	1	1	0.992512	0.933327	1	1	1.00298	1.02653	20.0748	4.91113	1.00298	1.00301	1.00102	1.00462	1.00298	1.00301
10	1	1	0.992435	0.932136	1	1	1.00301	1.02701	20.0748	4.95447	1.00301	1.00304	1.00103	1.00467	1.00301	1.00304
10.1	1	1	0.992358	0.930939	1	1	1.00304	1.02749	20.0748	4.99639	1.00304	1.00307	1.00104	1.00472	1.00304	1.00307
10.2	1	1	0.992282	0.929734	1	1	1.00307	1.02797	20.0748	5.03692	1.00307	1.0031	1.00105	1.00477	1.00307	1.0031
10.3	1	1	0.992205	0.928523	1	1	1.0031	1.02846	20.0747	5.07612	1.0031	1.00313	1.00106	1.00482	1.0031	1.00313
10.4	1	1	0.992129	0.927304	1	1	1.00313	1.02894	20.0747	5.11402	1.00313	1.00316	1.00107	1.00486	1.00313	1.00316
10.5	1	1	0.992053	0.926079	1	1	1.00316	1.02944	20.0747	5.15817	1.00316	1.00319	1.00108	1.00491	1.00316	1.00319
10.6	1	1	0.991976	0.924847	1	1	1.0032	1.02993	20.0747	5.20086	1.0032	1.00322	1.00109	1.00496	1.0032	1.00322
10.7	1	1	0.9919	0.923609	1	1	1.00323	1.03043	20.0747	5.24214	1.00323	1.00325	1.0011	1.00501	1.00323	1.00325
10.8	1	1	0.991824	0.922364	1	1	1.00326	1.03093	20.0747	5.28206	1.00326	1.00328	1.00111	1.00506	1.00326	1.00328
10.9	1	1	0.991748	0.921112	1	1	1.00329	1.03143	20.0747	5.32067	1.00329	1.00331	1.00112	1.0051	1.00329	1.00331
11	1	1	0.991672	0.919855	1	1	1.00332	1.03193	20.0747	5.36549	1.00332	1.00334	1.00114	1.00516	1.00332	1.00334
11.1	1	1	0.991596	0.91859	1	1	1.00335	1.03244	20.0747	5.40884	1.00335	1.00337	1.00115	1.00521	1.00335	1.00337
11.2	1	1	0.99152	0.91732	1	1	1.00338	1.03295	20.0747	5.45075	1.00338	1.0034	1.00116	1.00525	1.00338	1.0034
11.3	1	1	0.991444	0.916043	1	1	1.00341	1.03346	20.0747	5.49128	1.00341	1.00344	1.00117	1.0053	1.00341	1.00344
11.4	1	1	0.991368	0.91476	1	1	1.00344	1.03398	20.0746	5.53048	1.00344	1.00347	1.00118	1.00535	1.00344	1.00347
11.5	1	1	0.991293	0.913471	1	1	1.00347	1.03449	20.0746	5.56838	1.00347	1.0035	1.00119	1.00539	1.00347	1.0035
11.6	1	1	0.991217	0.912176	1	1	1.0035	1.03501	20.0746	5.61253	1.0035	1.00353	1.0012	1.00544	1.0035	1.00353
11.7	1	1	0.991141	0.910875	1	1	1.00353	1.03554	20.0746	5.65522	1.00353	1.00356	1.00121	1.00549	1.00353	1.00356
11.8	1	1	0.991066	0.909568	1	1	1.00356	1.03606	20.0746	5.6965	1.00356	1.00359	1.00122	1.00554	1.00356	1.00359
11.9	1	1	0.99099	0.908255	1	1	1.00359	1.03659	20.0746	5.73641	1.00359	1.00362	1.00123	1.00559	1.00359	1.00362
12	1	1	0.990915	0.906937	1	1	1.00362	1.03712	20.0746	5.77502	1.00362	1.00365	1.00124	1.00563	1.00362	1.00365
12.1	1	1	0.99084	0.905612	1	1	1.00365	1.03765	20.0746	5.81984	1.00365	1.00368	1.00125	1.00569	1.00365	1.00368
12.2	1	1	0.990765	0.904282	1	1	1.00368	1.03818	20.0746	5.86318	1.00368	1.00371	1.00126	1.00574	1.00368	1.00371
12.3	1	1	0.990689	0.902947	1	1	1.00371	1.03872	20.0746	5.9051	1.00371	1.00374	1.00127	1.00579	1.00371	1.00374
12.4	1	1	0.990614	0.901606	1	1	1.00375	1.03926	20.0746	5.94563	1.00375	1.00377	1.00128	1.00583	1.00375	1.00377
12.5	1	1	0.990539	0.900259	1	1	1.00378	1.0398	20.0746	5.98482	1.00378	1.0038	1.00129	1.00588	1.00378	1.0038
12.6	1	1	0.990464	0.898907	1	1	1.00381	1.04035	20.0746	6.02272	1.00381	1.00383	1.0013	1.00592	1.00381	1.00383
12.7	1	1	0.990389	0.89755	1	1	1.00384	1.04089	20.0746	6.06687	1.00384	1.00386	1.00132	1.00598	1.00384	1.00386
12.8	1	1	0.990315	0.896187	1	1	1.00387	1.04144	20.0746	6.10956	1.00387	1.00389	1.00133	1.00603	1.00387	1.00389
12.9	1	1	0.99024	0.894819	1	1	1.0039	1.04199	20.0746	6.15084	1.0039	1.00392	1.00134	1.00607	1.0039	1.00392
13	1	1	0.990165	0.893446	1	1	1.00393	1.04254	20.0746	6.19075	1.00393	1.00395	1.00135	1.00612	1.00393	1.00395
13.1	1	1	0.990091	0.892068	1	1	1.00396	1.0431	20.0746	6.22935	1.00396	1.00398	1.00136	1.00617	1.00396	1.00398
13.2	1	1	0.990016	0.890685	1	1	1.00399	1.04366	20.0745	6.27418	1.00399	1.00401	1.00137	1.00622	1.00399	1.00401
13.3	1	1	0.989942	0.889296	1	1	1.00402	1.04421	20.0745	6.31752	1.00402	1.00404	1.00138	1.00627	1.00402	1.00404
13.4	1	1	0.989867	0.887903	1	1	1.00405	1.04478	20.0745	6.35943	1.00405	1.00407	1.00139	1.00632	1.00405	1.00407
13.5	1	1	0.989793	0.886505	1	1	1.00408	1.04534	20.0745	6.39996	1.00408	1.0041	1.0014	1.00636	1.00408	1.0041
13.6	1	1	0.989718	0.885101	1	1	1.00411	1.0459	20.0745	6.43916	1.00411	1.00413	1.00141	1.00641	1.00411	1.00413
13.7	1	1	0.989644	0.883693	1	1	1.00414	1.04647	20.0745	6.47706	1.00414	1.00416	1.00142	1.00645	1.00414	1.00416
13.8	1	1	0.98957	0.882281	1	1	1.00417	1.04704	20.0745	6.5212	1.00417	1.00419	1.00143	1.00651	1.00417	1.00419
13.9	1	1	0.989496	0.880863	1	1	1.0042	1.04761	20.0745	6.56389	1.0042	1.00422	1.00144	1.00656	1.0042	1.00422
14	1	1	0.989422	0.879441	1	1	1.00423	1.04819	20.0745	6.60517	1.00423	1.00425	1.00145	1.0066	1.00423	1.00425
14.1	1	1	0.989348	0.878014	1	1	1.00426	1.04876	20.0745	6.64509	1.00426	1.00428	1.00146	1.00665	1.00426	1.00428
14.2	1	1	0.989274	0.876583	1	1	1.00429	1.04934	20.0745	6.68369	1.00429	1.00431	1.00147	1.0067	1.00429	1.00431
14.3	1	1	0.9892	0.875147	1	1	1.00432	1.04992	20.0745	6.72851	1.00432	1.00434	1.00148	1.00675	1.00432	1.00434
14.4	1	1	0.989127	0.873707	1	1	1.00435	1.0505	20.0745	6.77185	1.00435	1.00437	1.00149	1.0068	1.00435	1.00437
14.5	1	1	0.989053	0.872262	1	1	1.00438	1.05108	20.0745	6.81376	1.00438	1.0044	1.0015	1.00685	1.00438	1.0044
14.6	1	1	0.988979	0.870813	1	1	1.00441	1.05167	20.0745	6.85429	1.00441	1.00443	1.00151	1.00689	1.00441	1.00443
14.7	1	1	0.988906	0.869359	1	1	1.00444	1.05225	20.0745	6.89349	1.00444	1.00446	1.00152	1.00694	1.00444	1.00446
14.8	1	1	0.988832	0.867901	1	1	1.00447	1.05284	20.0745	6.93139	1.00447	1.00449	1.00153	1.00698	1.00447	1.00449
14.9	1	1	0.988759	0.866439	1	1	1.0045	1.05343	20.0745	6.97553	1.0045	1.00452	1.00154	1.00704	1.0045	1.00452
15	1	1	0.988685	0.864973	1	1	1.00453	1.05403	20.0745	7.01822	1.00453	1.00455	1.00155	1.00709	1.00453	1.00455
15.1	1	1	0.988612	0.863502	1	1	1.00456	1.05462	20.0745	7.0595	1.00456	1.00458	1.00157	1.00713	1.00456	1.00458
15.2	1	1	0.988539	0.862028	1	1	1.00459	1.05521	20.0745	7.09941	1.00459	1.00461	1.00158	1.00718	1.00459	1.00461
15.3	1	1	0.988466	0.860549	1	1	1.00462	1.05581	20.0745	7.13801	1.00462	1.00464	1.00159	1.00723	1.00462	1.00464
15.4	1	1	0.988393	0.859067	1	1	1.00465	1.05641	20.0745	7.18283	1.00465	1.00467	1.0016	1.00728	1.00465	1.00467
15.5	1	1	0.988319	0.85758	1	1	1.00468	1.05701	20.0745	7.22618	1.00468	1.0047	1.00161	1.00733	1.00468	1.0047
15.6	1	1	0.988246	0.85609	1	1	1.00471	1.05762	20.0745	7.26809	1.00471	1.00473	1.00162	1.00738	1.00471	1.00473
15.7	1	1	0.988174	0.854595	1	1	1.00474	1.05822	20.0745	7.30862	1.00474	1.00476	1.00163	1.00742	1.00474	1.00476
15.8	1	1	0.988101	0.853097	1	1	1.00476	1.05883	20.0745	7.34781	1.00476	1.00479	1.00164	1.00747	1.00476	1.00479
15.9	1	1	0.988028	0.851595	1	1	1.00479	1.05943	20.0745	7.38571	1.00479	1.00482	1.00165	1.00751	1.00479	1.00482
16	1	1	0.987955	0.850089	1	1	1.00482	1.06004	20.0745	7.42985	1.00482	1.00485	1.00166	1.00756	1.00482	1.00485
16.1	1	1	0.987883	0.848579	1	1	1.00485	1.06065	20.0745	7.47254	1.00485	1.00488	1.00167	1.00761	1.00485	1.00488
16.2	1	1	0.98781	0.847066	1	1	1.00488	1.06127	20.0745	7.51382	1.00488	1.00491	1.00168	1.00766	1.00488	1.00491
16.3	1	1	0.987737	0.845549	1	1	1.00491	1.06188	20.0745	7.55374	1.00491	1.00494	1.00169	1.00771	1.00491	1.00494
16.4	1	1	0.987665	0.844029	1	1	1.00494	1.0625	20.0745	7.59234	1.00494	1.00497	1.0017	1.00775	1.00494	1.00497
16.5	1	1	0.987593	0.842504	1	1	1.00497	1.06311	20.0745	7.63716	1.00497	1.005	1.00171	1.00781	1.00497	1.005
16.6	1	1	0.98752	0.840977	1	1	1.005	1.06373	20.0745	7.6805	1.005	1.00503	1.00172	1.00786	1.005	1.00503
16.7	1	1	0.987448	0.839446	1	1	1.00503	1.06435	20.0745	7.72241	1.00503	1.00506	1.00173	1.0079	1.00503	1.00506
16.8	1	1	0.987376	0.837911	1	1	1.00506	1.06497	20.0745	7.76294	1.00506	1.00509	1.00174	1.00795	1.00506	1.00509
16.9	1	1	0.987304	0.836373	1	1	1.00509	1.0656	20.0745	7.80213	1.00509	1.00512	1.00175	1.008	1.00509	1.00512
17	1	1	0.987232	0.834832	1	1	1.00512	1.06622	20.0745	7.84003	1.00512	1.00514	1.00176	1.00804	1.00512	1.00514
17.1	1	1	0.98716	0.833287	1	1	1.00515	1.06685	20.0745	7.88418	1.00515	1.00517	1.00177	1.00809	1.00515	1.00517
17.2	1	1	0.987088	0.831739	1	1	1.00518	1.06748	20.0745	7.92686	1.00518	1.0052	1.00178	1.00814	1.00518	1.0052
17.3	1	1	0.987016	0.830187	1	1	1.00521	1.0681	20.0745	7.96814	1.00521	1.00523	1.00179	1.00819	1.00521	1.00523
17.4	1	1	0.986944	0.828633	1	1	1.00524	1.06873	20.0745	8.00806	1.00524	1.00526	1.0018	1.00824	1.00524	1.00526
17.5	1	1	0.986872	0.827075	1	1	1.00527	1.06937	20.0745	8.04666	1.00527	1.00529	1.00181	1.00828	1.00527	1.00529
17.6	1	1	0.9868	0.825514	1	1	1.0053	1.07	20.0745	8.09148	1.0053	1.00532	1.00182	1.00833	1.0053	1.00532
17.7	1	1	0.986729	0.82395	1	1	1.00532	1.07063	20.0745	8.13482	1.00532	1.00535	1.00183	1.00838	1.00532	1.00535
17.8	1	1	0.986657	0.822383	1	1	1.00535	1.07127	20.0745	8.17673	1.00535	1.00538	1.00184	1.00843	1.00535	1.00538
17.9	1	1	0.986586	0.820812	1	1	1.00538	1.07191	20.0745	8.21726	1.00538	1.00541	1.00185	1.00848	1.00538	1.00541
18	1	1	0.986514	0.819239	1	1	1.00541	1.07255	20.0745	8.25646	1.00541	1.00544	1.00186	1.00852	1.00541	1.00544
18.1	1	1	0.986443	0.817663	1	1	1.00544	1.07319	20.0745	8.29435	1.00544	1.00547	1.00187	1.00857	1.00544	1.00547
18.2	1	1	0.986372	0.816083	1	1	1.00547	1.07383	20.0745	8.3385	1.00547	1.0055	1.00188	1.00862	1.00547	1.0055
18.3	1	1	0.9863	0.814501	1	1	1.0055	1.07447	20.0745	8.38119	1.0055	1.00553	1.00189	1.00867	1.0055	1.00553
18.4	1	1	0.986229	0.812916	1	1	1.00553	1.07511	20.0745	8.42246	1.00553	1.00555	1.0019	1.00872	1.00553	1.00555
18.5	1	1	0.986158	0.811328	1	1	1.00556	1.07576	20.0745	8.46238	1.00556	1.00558	1.00191	1.00876	1.00556	1.00558
18.6	1	1	0.986087	0.809737	1	1	1.00559	1.07641	20.0745	8.50098	1.00559	1.00561	1.00192	1.00881	1.00559	1.00561
18.7	1	1	0.986016	0.808143	1	1	1.00562	1.07705	20.0745	8.5458	1.00562	1.00564	1.00193	1.00886	1.00562	1.00564
18.8	1	1	0.985945	0.806547	1	1	1.00565	1.0777	20.0745	8.58914	1.00565	1.00567	1.00194	1.00891	1.00565	1.00567
18.9	1	1	0.985874	0.804948	1	1	1.00567	1.07835	20.0744	8.63106	1.00567	1.0057	1.00195	1.00896	1.00567	1.0057
19	1	1	0.985803	0.803346	1	1	1.0057	1.07901	20.0744	8.67158	1.0057	1.00573	1.00196	1.009	1.0057	1.00573
19.1	1	1	0.985733	0.801741	1	1	1.00573	1.07966	20.0744	8.71078	1.00573	1.00576	1.00197	1.00905	1.00573	1.00576
19.2	1	1	0.985662	0.800134	1	1	1.00576	1.08031	20.0744	8.74867	1.00576	1.00579	1.00198	1.00909	1.00576	1.00579
19.3	1	1	0.985591	0.798524	1	1	1.00579	1.08097	20.0744	8.79282	1.00579	1.00582	1.00199	1.00914	1.00579	1.00582
19.4	1	1	0.985521	0.796911	1	1	1.00582	1.08162	20.0744	8.83551	1.00582	1.00584	1.002	1.00919	1.00582	1.00584
19.5	1	1	0.98545	0.795296	1	1	1.00585	1.08228	20.0744	8.87678	1.00585	1.00587	1.00201	1.00924	1.00585	1.00587
19.6	1	1	0.98538	0.793679	1	1	1.00588	1.08294	20.0744	8.9167	1.00588	1.0059	1.00202	1.00929	1.00588	1.0059
19.7	1	1	0.985309	0.792058	1	1	1.00591	1.0836	20.0744	8.9553	1.00591	1.00593	1.00203	1.00933	1.00591	1.00593
19.8	1	1	0.985239	0.790436	1	1	1.00593	1.08426	20.0744	9.00012	1.00593	1.00596	1.00204	1.00938	1.00593	1.00596
19.9	1	1	0.985169	0.788811	1	1	1.00596	1.08492	20.0744	9.04346	1.00596	1.00599	1.00205	1.00943	1.00596	1.00599
20	1	1	0.985099	0.787183	1	1	1.00599	1.08558	20.0744	9.08537	1.00599	1.00602	1.00206	1.00948	1.00599	1.00602
20.1	1	1	0.985028	0.785553	1	1	1.00602	1.08625	20.0744	9.1259	1.00602	1.00605	1.00207	1.00953	1.00602	1.00605
20.2	1	1	0.984958	0.783921	1	1	1.00605	1.08691	20.0744	9.1651	1.00605	1.00608	1.00208	1.00957	1.00605	1.00608
20.3	1	1	0.984888	0.782286	1	1	1.00608	1.08758	20.0744	9.20299	1.00608	1.0061	1.00209	1.00962	1.00608	1.0061
20.4	1	1	0.984818	0.780649	1	1	1.00611	1.08825	20.0744	9.24714	1.00611	1.00613	1.0021	1.00967	1.00611	1.00613
20.5	1	1	0.984749	0.77901	1	1	1.00614	1.08892	20.0744	9.28982	1.00614	1.00616	1.00211	1.00972	1.00614	1.00616
20.6	1	1	0.984679	0.777368	1	1	1.00617	1.08958	20.0744	9.3311	1.00617	1.00619	1.00212	1.00977	1.00617	1.00619
20.7	1	1	0.984609	0.775724	1	1	1.00619	1.09026	20.0744	9.37102	1.00619	1.00622	1.00213	1.00981	1.00619	1.00622
20.8	1	1	0.984539	0.774078	1	1	1.00622	1.09093	20.0744	9.40962	1.00622	1.00625	1.00214	1.00986	1.00622	1.00625
20.9	1	1	0.98447	0.77243	1	1	1.00625	1.0916	20.0744	9.45444	1.00625	1.00628	1.00215	1.00991	1.00625	1.00628
21	1	1	0.9844	0.770779	1	1	1.00628	1.09227	20.0744	9.49778	1.00628	1.00631	1.00216	1.00996	1.00628	1.00631
21.1	1	1	0.984331	0.769126	1	1	1.00631	1.09295	20.0744	9.53969	1.00631	1.00633	1.00217	1.01001	1.00631	1.00633
21.2	1	1	0.984261	0.767472	1	1	1.00634	1.09362	20.0744	9.58022	1.00634	1.00636	1.00218	1.01005	1.00634	1.00636
21.3	1	1	0.984192	0.765815	1	1	1.00637	1.0943	20.0744	9.61941	1.00637	1.00639	1.00219	1.0101	1.00637	1.00639
21.4	1	1	0.984122	0.764156	1	1	1.00639	1.09498	20.0744	9.65731	1.00639	1.00642	1.0022	1.01014	1.00639	1.00642
21.5	1	1	0.984053	0.762495	1	1	1.00642	1.09565	20.0744	9.70146	1.00642	1.00645	1.00221	1.01019	1.00642	1.00645
21.6	1	1	0.983984	0.760831	1	1	1.00645	1.09633	20.0744	9.74414	1.00645	1.00648	1.00222	1.01024	1.00645	1.00648
21.7	1	1	0.983915	0.759166	1	1	1.00648	1.09701	20.0744	9.78542	1.00648	1.00651	1.00223	1.01029	1.00648	1.00651
21.8	1	1	0.983846	0.757499	1	1	1.00651	1.0977	20.0744	9.82534	1.00651	1.00653	1.00224	1.01033	1.00651	1.00653
21.9	1	1	0.983777	0.75583	1	1	1.00654	1.09838	20.0744	9.86394	1.00654	1.00656	1.00225	1.01038	1.00654	1.00656
22	1	1	0.983708	0.754159	1	1	1.00656	1.09906	20.0744	9.90876	1.00656	1.00659	1.00226	1.01043	1.00656	1.00659
22.1	1	1	0.983639	0.752486	1	1	1.00659	1.09974	20.0744	9.9521	1.00659	1.00662	1.00227	1.01048	1.00659	1.00662
22.2	1	1	0.98357	0.750811	1	1	1.00662	1.10043	20.0744	9.99401	1.00662	1.00665	1.00228	1.01053	1.00662	1.00665
22.3	1	1	0.983501	0.749135	1	1	1.00665	1.10112	20.0744	10.0345	1.00665	1.00668	1.00229	1.01058	1.00665	1.00668
22.4	1	1	0.983432	0.747456	1	1	1.00668	1.1018	20.0744	10.0737	1.00668	1.0067	1.0023	1.01062	1.00668	1.0067
22.5	1	1	0.983364	0.745775	1	1	1.00671	1.10249	20.0744	10.1116	1.00671	1.00673	1.00231	1.01066	1.00671	1.00673
22.6	1	1	0.983295	0.744093	1	1	1.00674	1.10318	20.0744	10.1558	1.00674	1.00676	1.00232	1.01071	1.00674	1.00676
22.7	1	1	0.983227	0.742409	1	1	1.00676	1.10387	20.0744	10.1985	1.00676	1.00679	1.00233	1.01076	1.00676	1.00679
22.8	1	1	0.983158	0.740723	1	1	1.00679	1.10456	20.0744	10.2397	1.00679	1.00682	1.00234	1.01081	1.00679	1.00682
22.9	1	1	0.98309	0.739036	1	1	1.00682	1.10525	20.0744	10.2797	1.00682	1.00685	1.00235	1.01086	1.00682	1.00685
23	1	1	0.983021	0.737346	1	1	1.00685	1.10594	20.0744	10.3183	1.00685	1.00687	1.00236	1.0109	1.00685	1.00687
23.1	1	1	0.982953	0.735655	1	1	1.00688	1.10663	20.0744	10.3631	1.00688	1.0069	1.00237	1.01095	1.00688	1.0069
23.2	1	1	0.982885	0.733962	1	1	1.0069	1.10732	20.0744	10.4064	1.0069	1.00693	1.00238	1.011	1.0069	1.00693
23.3	1	1	0.982817	0.732268	1	1	1.00693	1.10802	20.0744	10.4483	1.00693	1.00696	1.00239	1.01105	1.00693	1.00696
23.4	1	1	0.982748	0.730572	1	1	1.00696	1.10871	20.0744	10.4889	1.00696	1.00699	1.0024	1.0111	1.00696	1.00699
23.5	1	1	0.98268	0.728874	1	1	1.00699	1.10941	20.0744	10.5281	1.00699	1.00701	1.00241	1.01114	1.00699	1.00701
23.6	1	1	0.982612	0.727175	1	1	1.00702	1.11011	20.0744	10.5659	1.00702	1.00704	1.00242	1.01119	1.00702	1.00704
23.7	1	1	0.982544	0.725474	1	1	1.00705	1.1108	20.0744	10.6101	1.00705	1.00707	1.00243	1.01124	1.00705	1.00707
23.8	1	1	0.982477	0.723771	1	1	1.00707	1.1115	20.0744	10.6528	1.00707	1.0071	1.00244	1.01129	1.00707	1.0071
23.9	1	1	0.982409	0.722067	1	1	1.0071	1.1122	20.0744	10.6941	1.0071	1.00713	1.00245	1.01133	1.0071	1.00713
24	1	1	0.982341	0.720361	1	1	1.00713	1.1129	20.0744	10.734	1.00713	1.00716	1.00246	1.01138	1.00713	1.00716
24.1	1	1	0.982273	0.718654	1	1	1.00716	1.1136	20.0744	10.7726	1.00716	1.00718	1.00247	1.01142	1.00716	1.00718
24.2	1	1	0.982206	0.716945	1	1	1.00719	1.1143	20.0744	10.8174	1.00719	1.00721	1.00248	1.01147	1.00719	1.00721
24.3	1	1	0.982138	0.715235	1	1	1.00721	1.115	20.0744	10.8607	1.00721	1.00724	1.00249	1.01152	1.00721	1.00724
24.4	1	1	0.982071	0.713523	1	1	1.00724	1.11571	20.0744	10.9026	1.00724	1.00727	1.0025	1.01157	1.00724	1.00727
24.5	1	1	0.982003	0.71181	1	1	1.00727	1.11641	20.0744	10.9432	1.00727	1.0073	1.00251	1.01162	1.00727	1.0073
24.6	1	1	0.981936	0.710095	1	1	1.0073	1.11711	20.0744	10.9824	1.0073	1.00732	1.00252	1.01166	1.0073	1.00732
24.7	1	1	0.981868	0.708379	1	1	1.00733	1.11782	20.0744	11.0203	1.00733	1.00735	1.00253	1.01171	1.00733	1.00735
24.8	1	1	0.981801	0.706662	1	1	1.00735	1.11852	20.0744	11.0644	1.00735	1.00738	1.00254	1.01176	1.00735	1.00738
24.9	1	1	0.981734	0.704943	1	1	1.00738	1.11923	20.0744	11.1071	1.00738	1.00741	1.00255	1.01181	1.00738	1.00741
25	1	1	0.981667	0.703223	1	1	1.00741	1.11993	20.0744	11.1484	1.00741	1.00743	1.00256	1.01185	1.00741	1.00743
25.1	1	1	0.9816	0.701501	1	1	1.00744	1.12064	20.0744	11.1883	1.00744	1.00746	1.00257	1.0119	1.00744	1.00746
25.2	1	1	0.981532	0.699778	1	1	1.00746	1.12135	20.0744	11.2269	1.00746	1.00749	1.00258	1.01194	1.00746	1.00749
25.3	1	1	0.981465	0.698054	1	1	1.00749	1.12206	20.0744	11.2717	1.00749	1.00752	1.00259	1.01199	1.00749	1.00752
25.4	1	1	0.981399	0.696328	1	1	1.00752	1.12277	20.0744	11.3151	1.00752	1.00755	1.0026	1.01204	1.00752	1.00755
25.5	1	1	0.981332	0.694601	1	1	1.00755	1.12348	20.0744	11.357	1.00755	1.00757	1.00261	1.01209	1.00755	1.00757
25.6	1	1	0.981265	0.692873	1	1	1.00758	1.12419	20.0744	11.3975	1.00758	1.0076	1.00262	1.01214	1.00758	1.0076
25.7	1	1	0.981198	0.691143	1	1	1.0076	1.1249	20.0744	11.4367	1.0076	1.00763	1.00263	1.01218	1.0076	1.00763
25.8	1	1	0.981131	0.689412	1	1	1.00763	1.12561	20.0744	11.4746	1.00763	1.00766	1.00264	1.01223	1.00763	1.00766
25.9	1	1	0.981065	0.68768	1	1	1.00766	1.12632	20.0744	11.5187	1.00766	1.00768	1.00265	1.01228	1.00766	1.00768
26	1	1	0.980998	0.685947	1	1	1.00769	1.12704	20.0744	11.5614	1.00769	1.00771	1.00265	1.01232	1.00769	1.00771
26.1	1	1	0.980932	0.684213	1	1	1.00771	1.12775	20.0744	11.6027	1.00771	1.00774	1.00266	1.01237	1.00771	1.00774
26.2	1	1	0.980865	0.682477	1	1	1.00774	1.12847	20.0744	11.6426	1.00774	1.00777	1.00267	1.01242	1.00774	1.00777
26.3	1	1	0.980799	0.68074	1	1	1.00777	1.12918	20.0744	11.6812	1.00777	1.00779	1.00268	1.01246	1.00777	1.00779
26.4	1	1	0.980732	0.679002	1	1	1.0078	1.1299	20.0744	11.726	1.0078	1.00782	1.00269	1.01251	1.0078	1.00782
26.5	1	1	0.980666	0.677263	1	1	1.00782	1.13061	20.0744	11.7694	1.00782	1.00785	1.0027	1.01256	1.00782	1.00785
26.6	1	1	0.9806	0.675523	1	1	1.00785	1.13133	20.0744	11.8113	1.00785	1.00788	1.00271	1.01261	1.00785	1.00788
26.7	1	1	0.980534	0.673781	1	1	1.00788	1.13205	20.0744	11.8518	1.00788	1.00791	1.00272	1.01266	1.00788	1.00791
26.8	1	1	0.980468	0.672039	1	1	1.00791	1.13276	20.0744	11.891	1.00791	1.00793	1.00273	1.0127	1.00791	1.00793
26.9	1	1	0.980402	0.670295	1	1	1.00793	1.13348	20.0744	11.9289	1.00793	1.00796	1.00274	1.01274	1.00793	1.00796
27	1	1	0.980335	0.66855	1	1	1.00796	1.1342	20.0744	11.973	1.00796	1.00799	1.00275	1.01279	1.00796	1.00799
27.1	1	1	0.98027	0.666804	1	1	1.00799	1.13492	20.0744	12.0157	1.00799	1.00802	1.00276	1.01284	1.00799	1.00802
27.2	1	1	0.980204	0.665057	1	1	1.00802	1.13564	20.0744	12.057	1.00802	1.00804	1.00277	1.01289	1.00802	1.00804
27.3	1	1	0.980138	0.663309	1	1	1.00804	1.13636	20.0744	12.0969	1.00804	1.00807	1.00278	1.01294	1.00804	1.00807
27.4	1	1	0.980072	0.66156	1	1	1.00807	1.13708	20.0744	12.1355	1.00807	1.0081	1.00279	1.01298	1.00807	1.0081
27.5	1	1	0.980006	0.65981	1	1	1.0081	1.13781	20.0744	12.1804	1.0081	1.00812	1.0028	1.01303	1.0081	1.00812
27.6	1	1	0.979941	0.658059	1	1	1.00813	1.13853	20.0744	12.2237	1.00813	1.00815	1.00281	1.01308	1.00813	1.00815
27.7	1	1	0.979875	0.656307	1	1	1.00815	1.13925	20.0744	12.2656	1.00815	1.00818	1.00282	1.01313	1.00815	1.00818
27.8	1	1	0.97981	0.654554	1	1	1.00818	1.13997	20.0744	12.3061	1.00818	1.00821	1.00283	1.01317	1.00818	1.00821
27.9	1	1	0.979744	0.6528	1	1	1.00821	1.1407	20.0744	12.3453	1.00821	1.00823	1.00284	1.01322	1.00821	1.00823
28	1	1	0.979679	0.651045	1	1	1.00824	1.14142	20.0744	12.3832	1.00824	1.00826	1.00285	1.01326	1.00824	1.00826
28.1	1	1	0.979613	0.649289	1	1	1.00826	1.14215	20.0744	12.4274	1.00826	1.00829	1.00286	1.01331	1.00826	1.00829
28.2	1	1	0.979548	0.647532	1	1	1.00829	1.14287	20.0744	12.4701	1.00829	1.00832	1.00287	1.01336	1.00829	1.00832
28.3	1	1	0.979483	0.645775	1	1	1.00832	1.1436	20.0744	12.5113	1.00832	1.00834	1.00288	1.01341	1.00832	1.00834
28.4	1	1	0.979417	0.644016	1	1	1.00834	1.14433	20.0744	12.5512	1.00834	1.00837	1.00288	1.01345	1.00834	1.00837
28.5	1	1	0.979352	0.642256	1	1	1.00837	1.14505	20.0744	12.5898	1.00837	1.0084	1.00289	1.0135	1.00837	1.0084
28.6	1	1	0.979287	0.640496	1	1	1.0084	1.14578	20.0744	12.6347	1.0084	1.00842	1.0029	1.01355	1.0084	1.00842
28.7	1	1	0.979222	0.638734	1	1	1.00843	1.14651	20.0744	12.678	1.00843	1.00845	1.00291	1.0136	1.00843	1.00845
28.8	1	1	0.979157	0.636972	1	1	1.00845	1.14724	20.0744	12.7199	1.00845	1.00848	1.00292	1.01364	1.00845	1.00848
28.9	1	1	0.979092	0.635209	1	1	1.00848	1.14797	20.0744	12.7605	1.00848	1.00851	1.00293	1.01369	1.00848	1.00851
29	1	1	0.979027	0.633445	1	1	1.00851	1.14869	20.0744	12.7996	1.00851	1.00853	1.00294	1.01373	1.00851	1.00853
29.1	1	1	0.978963	0.63168	1	1	1.00853	1.14942	20.0744	12.8375	1.00853	1.00856	1.00295	1.01378	1.00853	1.00856
29.2	1	1	0.978898	0.629914	1	1	1.00856	1.15015	20.0744	12.8817	1.00856	1.00859	1.00296	1.01383	1.00856	1.00859
29.3	1	1	0.978833	0.628148	1	1	1.00859	1.15089	20.0744	12.9244	1.00859	1.00861	1.00297	1.01388	1.00859	1.00861
29.4	1	1	0.978769	0.626381	1	1	1.00862	1.15162	20.0744	12.9657	1.00862	1.00864	1.00298	1.01392	1.00862	1.00864
29.5	1	1	0.978704	0.624612	1	1	1.00864	1.15235	20.0744	13.0056	1.00864	1.00867	1.00299	1.01397	1.00864	1.00867
29.6	1	1	0.978639	0.622843	1	1	1.00867	1.15308	20.0744	13.0442	1.00867	1.0087	1.003	1.01401	1.00867	1.0087
29.7	1	1	0.978575	0.621074	1	1	1.0087	1.15381	20.0744	13.089	1.0087	1.00872	1.00301	1.01406	1.0087	1.00872
29.8	1	1	0.978511	0.619303	1	1	1.00872	1.15455	20.0744	13.1323	1.00872	1.00875	1.00302	1.01411	1.00872	1.00875
29.9	1	1	0.978446	0.617532	1	1	1.00875	1.15528	20.0744	13.1742	1.00875	1.00878	1.00303	1.01416	1.00875	1.00878
30	1	1	0.978382	0.61576	1	1	1.00878	1.15601	20.0744	13.2148	1.00878	1.0088	1.00304	1.01421	1.00878	1.0088
