# Supplementary material for: Simple rules can guide whether land- or ocean-based conservation will best benefit marine ecosystems
Source: PLoS Biol. 2017 Sep 6;15(9):e2001886. doi: 10.1371/journal.pbio.2001886 (PMC5587113; doi:10.1371/journal.pbio.2001886)
Supplement: S9 Data — (XLS) [file pbio.2001886.s020.xls]

## Sheet: Sheet1
	Action - Protect Ocean								Action - Restore Ocean								Action - Protect Land								Action - Restore Land
Time	Protected Ocean	Restoring Ocean	Available Ocean	Cleared Ocean	Protected Land	Restoring Land	Available Land	Cleared Land	Protected Ocean	Restoring Ocean	Available Ocean	Cleared Ocean	Protected Land	Restoring Land	Available Land	Cleared Land	Protected Ocean	Restoring Ocean	Available Ocean	Cleared Ocean	Protected Land	Restoring Land	Available Land	Cleared Land	Protected Ocean	Restoring Ocean	Available Ocean	Cleared Ocean	Protected Land	Restoring Land	Available Land	Cleared Land
0.1	0.000846919	0.000847342	0.710396	1	0.102816	0.102816	0.193989	1	0.000846919	0.000847342	0.710396	1	0.102816	0.102816	0.193989	1	0.000846919	0.000847342	0.710396	1	0.102816	0.102816	0.193989	1	0.000846919	0.000847342	0.710396	1	0.102816	0.102816	0.193989	1
0.2	0.00246319	0.0024636	0.710844	1	0.102816	0.102816	0.193921	1	0.000846933	0.00103982	0.711037	1	0.102816	0.102816	0.193921	1	0.000846933	0.000847342	0.710844	1	0.118112	0.118112	0.193921	1	0.000846933	0.000847342	0.710844	1	0.102816	0.104375	0.195481	1
0.3	0.00407946	0.00407986	0.711293	1	0.102816	0.102816	0.193854	1	0.000853298	0.00123231	0.711677	1	0.102816	0.102816	0.193854	1	0.000846946	0.000847342	0.711292	1	0.133408	0.133408	0.193865	1	0.000846946	0.000847342	0.711292	1	0.102831	0.105935	0.196973	1
0.4	0.00569573	0.00569612	0.711743	1	0.102816	0.102816	0.193786	1	0.000865806	0.00142479	0.712318	1	0.102816	0.102816	0.193786	1	0.00084696	0.000847342	0.711741	1	0.148704	0.148704	0.19382	1	0.00084696	0.000847342	0.711741	1	0.102862	0.107495	0.198466	1
0.5	0.007312	0.00731237	0.712194	1	0.102816	0.102816	0.193719	1	0.000884252	0.00161727	0.71296	1	0.102816	0.102816	0.193719	1	0.000846972	0.000847342	0.71219	1	0.164	0.164	0.193787	1	0.000846972	0.000847342	0.71219	1	0.102909	0.109055	0.199958	1
0.6	0.00892827	0.00892863	0.712647	1	0.102816	0.102816	0.193652	1	0.000908442	0.00180975	0.713601	1	0.102816	0.102816	0.193652	1	0.000846984	0.000847342	0.712639	1	0.179296	0.179296	0.193765	1	0.000846984	0.000847342	0.712639	1	0.10297	0.110614	0.201451	1
0.7	0.0105445	0.0105449	0.7131	1	0.102816	0.102816	0.193585	1	0.000938185	0.00200223	0.714243	1	0.102816	0.102816	0.193585	1	0.000846996	0.000847342	0.713088	1	0.193765	0.193765	0.193754	1	0.000846996	0.000847342	0.713088	1	0.103046	0.112174	0.202943	1
0.8	0.0121608	0.0121611	0.713555	1	0.102816	0.102816	0.193518	1	0.000973298	0.00200223	0.714693	1	0.102816	0.102816	0.193518	1	0.000847008	0.000847342	0.713538	1	0.193754	0.193754	0.193754	1	0.000847007	0.000847342	0.713537	1	0.103138	0.113734	0.204436	1
0.9	0.0137771	0.0137774	0.71401	1	0.102816	0.102816	0.19345	1	0.00100725	0.00200223	0.715143	1	0.102816	0.102816	0.19345	1	0.000847019	0.000847342	0.713988	1	0.193754	0.193754	0.193754	1	0.000847017	0.000847341	0.713987	1	0.103244	0.115294	0.205928	1
1	0.0153933	0.0153937	0.714467	1	0.102816	0.102816	0.193383	1	0.00104009	0.00219471	0.715786	1	0.102816	0.102816	0.193383	1	0.000847029	0.000847342	0.714438	1	0.193754	0.193754	0.193754	1	0.000847026	0.000847339	0.714436	1	0.103364	0.116853	0.207421	1
1.1	0.0170096	0.0170099	0.714925	1	0.102816	0.102816	0.193316	1	0.00107819	0.00219471	0.716237	1	0.102816	0.102816	0.193316	1	0.00084704	0.000847342	0.714889	1	0.193754	0.193754	0.193754	1	0.000847035	0.000847337	0.714884	1	0.103499	0.118413	0.208914	1
1.2	0.0170096	0.0170099	0.715384	1	0.102816	0.102816	0.193249	1	0.00111504	0.00219471	0.716688	1	0.102816	0.102816	0.193249	1	0.00084705	0.000847342	0.715339	1	0.193754	0.193754	0.193754	1	0.000847042	0.000847335	0.715333	1	0.103648	0.119973	0.210407	1
1.3	0.0170096	0.0170099	0.715843	1	0.102816	0.102816	0.193182	1	0.00115066	0.00219471	0.717139	1	0.102816	0.102816	0.193182	1	0.000847059	0.000847342	0.71579	1	0.193754	0.193754	0.193754	1	0.000847048	0.000847331	0.715781	1	0.103811	0.121533	0.2119	1
1.4	0.0170096	0.0170099	0.716303	1	0.102816	0.102816	0.193116	1	0.00118512	0.00219471	0.717591	1	0.102816	0.102816	0.193116	1	0.000847069	0.000847342	0.716242	1	0.193754	0.193754	0.193754	1	0.000847053	0.000847327	0.716229	1	0.103989	0.123092	0.213392	1
1.5	0.0170097	0.0170099	0.716762	1	0.102816	0.102816	0.193049	1	0.00121843	0.00219471	0.718043	1	0.102816	0.102816	0.193049	1	0.000847078	0.000847342	0.716693	1	0.193754	0.193754	0.193754	1	0.000847058	0.000847323	0.716677	1	0.10418	0.124652	0.214885	1
1.6	0.0170097	0.0170099	0.717222	1	0.102816	0.102816	0.192982	1	0.00125065	0.0023872	0.718688	1	0.102816	0.102816	0.192982	1	0.000847086	0.000847342	0.717145	1	0.193754	0.193754	0.193754	1	0.000847062	0.000847318	0.717124	1	0.104384	0.126212	0.216378	1
1.7	0.0170097	0.0170099	0.717683	1	0.102816	0.102816	0.192915	1	0.00128816	0.0023872	0.71914	1	0.102816	0.102816	0.192915	1	0.000847095	0.000847342	0.717598	1	0.193754	0.193754	0.193754	1	0.000847065	0.000847312	0.717572	1	0.104603	0.127772	0.217871	1
1.8	0.0170097	0.0170099	0.718143	1	0.102816	0.102816	0.192849	1	0.00132443	0.0023872	0.719593	1	0.102816	0.102816	0.192849	1	0.000847103	0.000847342	0.71805	1	0.193754	0.193754	0.193754	1	0.000847066	0.000847306	0.718019	1	0.104834	0.129331	0.219364	1
1.9	0.0170097	0.0170099	0.718604	1	0.102816	0.102816	0.192782	1	0.0013595	0.0023872	0.720047	1	0.102816	0.102816	0.192782	1	0.000847111	0.000847342	0.718503	1	0.193754	0.193754	0.193754	1	0.000847068	0.000847299	0.718466	1	0.105079	0.130891	0.220858	1
2	0.0170097	0.0170099	0.719066	1	0.102816	0.102816	0.192715	1	0.00139341	0.0023872	0.7205	1	0.102816	0.102816	0.192715	1	0.000847119	0.000847342	0.718956	1	0.193754	0.193754	0.193754	1	0.000847068	0.000847292	0.718913	1	0.105337	0.132451	0.222351	1
2.1	0.0170097	0.0170099	0.719527	1	0.102816	0.102816	0.192649	1	0.00142621	0.00257968	0.721147	1	0.102816	0.102816	0.192649	1	0.000847126	0.000847342	0.719409	1	0.193754	0.193754	0.193754	1	0.000847068	0.000847284	0.71936	1	0.105609	0.134011	0.223844	1
2.2	0.0170097	0.0170099	0.719989	1	0.102816	0.102816	0.192582	1	0.00146427	0.00257968	0.721601	1	0.102816	0.102816	0.192582	1	0.000847133	0.000847342	0.719863	1	0.193754	0.193754	0.193754	1	0.000847066	0.000847276	0.719806	1	0.105893	0.13557	0.225337	1
2.3	0.0170097	0.0170099	0.720451	1	0.102816	0.102816	0.192516	1	0.00150108	0.00257968	0.722056	1	0.102816	0.102816	0.192516	1	0.00084714	0.000847342	0.720317	1	0.193754	0.193754	0.193754	1	0.000847064	0.000847267	0.720253	1	0.106189	0.13713	0.226831	1
2.4	0.0170097	0.0170099	0.720913	1	0.102816	0.102816	0.19245	1	0.00153667	0.00257968	0.722511	1	0.102816	0.102816	0.19245	1	0.000847147	0.000847342	0.720771	1	0.193754	0.193754	0.193754	1	0.000847062	0.000847257	0.720699	1	0.106499	0.13869	0.228324	1
2.5	0.0170097	0.0170099	0.721376	1	0.102816	0.102816	0.192383	1	0.00157109	0.00257968	0.722966	1	0.102816	0.102816	0.192383	1	0.000847153	0.000847342	0.721226	1	0.193754	0.193754	0.193754	1	0.000847058	0.000847248	0.721145	1	0.106821	0.14025	0.229817	1
2.6	0.0170097	0.0170099	0.721839	1	0.102816	0.102816	0.192317	1	0.00160438	0.00257968	0.723422	1	0.102816	0.102816	0.192317	1	0.000847159	0.000847342	0.72168	1	0.193754	0.193754	0.193754	1	0.000847054	0.000847237	0.721591	1	0.107155	0.14181	0.231311	1
2.7	0.0170097	0.0170099	0.722302	1	0.102816	0.102816	0.192251	1	0.00163656	0.00277216	0.72407	1	0.102816	0.102816	0.192251	1	0.000847165	0.000847342	0.722136	1	0.193754	0.193754	0.193754	1	0.000847049	0.000847226	0.722036	1	0.107502	0.143369	0.232804	1
2.8	0.0170097	0.0170099	0.722766	1	0.102816	0.102816	0.192185	1	0.00167404	0.00277216	0.724526	1	0.102816	0.102816	0.192185	1	0.000847171	0.000847342	0.722591	1	0.193754	0.193754	0.193754	1	0.000847044	0.000847215	0.722482	1	0.10786	0.144929	0.234298	1
2.9	0.0170098	0.0170099	0.72323	1	0.102816	0.102816	0.192118	1	0.00171027	0.00277216	0.724983	1	0.102816	0.102816	0.192118	1	0.000847177	0.000847342	0.723047	1	0.193754	0.193754	0.193754	1	0.000847037	0.000847203	0.722928	1	0.108231	0.146489	0.235792	1
3	0.0170098	0.0170099	0.723694	1	0.102816	0.102816	0.192052	1	0.00174532	0.00277216	0.72544	1	0.102816	0.102816	0.192052	1	0.000847182	0.000847342	0.723503	1	0.193754	0.193754	0.193754	1	0.000847031	0.000847191	0.723373	1	0.108613	0.148049	0.237285	1
3.1	0.0170098	0.0170099	0.724158	1	0.102816	0.102816	0.191986	1	0.0017792	0.00277216	0.725897	1	0.102816	0.102816	0.191986	1	0.000847188	0.000847342	0.723959	1	0.193754	0.193754	0.193754	1	0.000847023	0.000847178	0.723818	1	0.109008	0.149608	0.238779	1
3.2	0.0170098	0.0170099	0.724623	1	0.102816	0.102816	0.19192	1	0.00181197	0.00296464	0.726547	1	0.102816	0.102816	0.19192	1	0.000847193	0.000847342	0.724415	1	0.193754	0.193754	0.193754	1	0.000847015	0.000847164	0.724263	1	0.109414	0.151168	0.240273	1
3.3	0.0170098	0.0170099	0.725088	1	0.102816	0.102816	0.191854	1	0.00185001	0.00296464	0.727005	1	0.102816	0.102816	0.191854	1	0.000847198	0.000847342	0.724872	1	0.193754	0.193754	0.193754	1	0.000847006	0.000847151	0.724708	1	0.109831	0.152728	0.241767	1
3.4	0.0170098	0.0170099	0.725553	1	0.102816	0.102816	0.191788	1	0.00188679	0.00296464	0.727463	1	0.102816	0.102816	0.191788	1	0.000847203	0.000847342	0.725329	1	0.193754	0.193754	0.193754	1	0.000846996	0.000847136	0.725153	1	0.11026	0.154288	0.243261	1
3.5	0.0170098	0.0170099	0.726019	1	0.102816	0.102816	0.191723	1	0.00192236	0.00296464	0.727922	1	0.102816	0.102816	0.191723	1	0.000847207	0.000847342	0.725787	1	0.193754	0.193754	0.193754	1	0.000846986	0.000847122	0.725597	1	0.110701	0.155847	0.244754	1
3.6	0.0170098	0.0170099	0.726485	1	0.102816	0.102816	0.191657	1	0.00195675	0.00296464	0.728381	1	0.102816	0.102816	0.191657	1	0.000847212	0.000847342	0.726244	1	0.193754	0.193754	0.193754	1	0.000846976	0.000847106	0.726042	1	0.111152	0.157407	0.246248	1
3.7	0.0170098	0.0170099	0.726951	1	0.102816	0.102816	0.191591	1	0.00199001	0.00296464	0.72884	1	0.102816	0.102816	0.191591	1	0.000847216	0.000847342	0.726702	1	0.193754	0.193754	0.193754	1	0.000846964	0.000847091	0.726486	1	0.111615	0.158967	0.247742	1
3.8	0.0170098	0.0170099	0.727417	1	0.102816	0.102816	0.191525	1	0.00202218	0.00315712	0.729492	1	0.102816	0.102816	0.191525	1	0.00084722	0.000847342	0.72716	1	0.193754	0.193754	0.193754	1	0.000846952	0.000847075	0.726931	1	0.112088	0.160527	0.249236	1
3.9	0.0170098	0.0170099	0.727884	1	0.102816	0.102816	0.19146	1	0.00205963	0.00315712	0.729952	1	0.102816	0.102816	0.19146	1	0.000847224	0.000847342	0.727619	1	0.193754	0.193754	0.193754	1	0.00084694	0.000847058	0.727375	1	0.112573	0.162086	0.250731	1
4	0.0170098	0.0170099	0.728351	1	0.102816	0.102816	0.191394	1	0.00209585	0.00315712	0.730412	1	0.102816	0.102816	0.191394	1	0.000847228	0.000847342	0.728078	1	0.193754	0.193754	0.193754	1	0.000846927	0.000847041	0.727819	1	0.113068	0.163646	0.252225	1
4.1	0.0170098	0.0170099	0.728819	1	0.102816	0.102816	0.191329	1	0.00213087	0.00315712	0.730873	1	0.102816	0.102816	0.191329	1	0.000847232	0.000847342	0.728537	1	0.193754	0.193754	0.193754	1	0.000846913	0.000847024	0.728263	1	0.113573	0.165206	0.253719	1
4.2	0.0170098	0.0170099	0.729286	1	0.102816	0.102816	0.191263	1	0.00216474	0.00315712	0.731334	1	0.102816	0.102816	0.191263	1	0.000847235	0.000847342	0.728996	1	0.193754	0.193754	0.193754	1	0.000846899	0.000847006	0.728707	1	0.11409	0.166766	0.255213	1
4.3	0.0170098	0.0170099	0.729754	1	0.102816	0.102816	0.191198	1	0.00219748	0.0033496	0.731987	1	0.102816	0.102816	0.191198	1	0.000847239	0.000847342	0.729456	1	0.193754	0.193754	0.193754	1	0.000846884	0.000846988	0.729151	1	0.114617	0.168325	0.256708	1
4.4	0.0170098	0.0170099	0.730223	1	0.102816	0.102816	0.191132	1	0.0022355	0.0033496	0.732449	1	0.102816	0.102816	0.191132	1	0.000847242	0.000847342	0.729916	1	0.193754	0.193754	0.193754	1	0.000846869	0.000846969	0.729594	1	0.115154	0.169885	0.258202	1
4.5	0.0170098	0.0170099	0.730691	1	0.102816	0.102816	0.191067	1	0.00227227	0.0033496	0.732911	1	0.102816	0.102816	0.191067	1	0.000847246	0.000847342	0.730376	1	0.193754	0.193754	0.193754	1	0.000846853	0.00084695	0.730038	1	0.115701	0.171445	0.259696	1
4.6	0.0170098	0.0170099	0.73116	1	0.102816	0.102816	0.191002	1	0.00230782	0.0033496	0.733373	1	0.102816	0.102816	0.191002	1	0.000847249	0.000847342	0.730837	1	0.193754	0.193754	0.193754	1	0.000846837	0.000846931	0.730482	1	0.116258	0.173005	0.261191	1
4.7	0.0170098	0.0170099	0.731629	1	0.102816	0.102816	0.190936	1	0.0023422	0.0033496	0.733835	1	0.102816	0.102816	0.190936	1	0.000847252	0.000847342	0.731298	1	0.193754	0.193754	0.193754	1	0.000846821	0.000846911	0.730925	1	0.116826	0.174564	0.262685	1
4.8	0.0170098	0.0170099	0.732098	1	0.102816	0.102816	0.190871	1	0.00237544	0.0033496	0.734298	1	0.102816	0.102816	0.190871	1	0.000847255	0.000847342	0.731759	1	0.193754	0.193754	0.193754	1	0.000846803	0.000846891	0.731369	1	0.117403	0.176124	0.26418	1
4.9	0.0170098	0.0170099	0.732568	1	0.102816	0.102816	0.190806	1	0.00240759	0.00354208	0.734954	1	0.102816	0.102816	0.190806	1	0.000847258	0.000847342	0.73222	1	0.193754	0.193754	0.193754	1	0.000846786	0.00084687	0.731812	1	0.11799	0.177684	0.265674	1
5	0.0170098	0.0170099	0.733038	1	0.102816	0.102816	0.190741	1	0.00244503	0.00354208	0.735417	1	0.102816	0.102816	0.190741	1	0.000847261	0.000847342	0.732682	1	0.193754	0.193754	0.193754	1	0.000846767	0.000846849	0.732255	1	0.118587	0.179244	0.267169	1
5.1	0.0170098	0.0170099	0.733509	1	0.102816	0.102816	0.190676	1	0.00248123	0.00354208	0.735881	1	0.102816	0.102816	0.190676	1	0.000847263	0.000847342	0.733144	1	0.193754	0.193754	0.193754	1	0.000846749	0.000846828	0.732699	1	0.119194	0.180803	0.268664	1
5.2	0.0170098	0.0170099	0.733979	1	0.102816	0.102816	0.190611	1	0.00251624	0.00354208	0.736345	1	0.102816	0.102816	0.190611	1	0.000847266	0.000847342	0.733606	1	0.193754	0.193754	0.193754	1	0.00084673	0.000846806	0.733142	1	0.11981	0.182363	0.270158	1
5.3	0.0170098	0.0170099	0.73445	1	0.102816	0.102816	0.190546	1	0.00255009	0.00354208	0.73681	1	0.102816	0.102816	0.190546	1	0.000847268	0.000847342	0.734069	1	0.193754	0.193754	0.193754	1	0.00084671	0.000846784	0.733585	1	0.120436	0.183923	0.271653	1
5.4	0.0170098	0.0170099	0.734921	1	0.102816	0.102816	0.190481	1	0.00258283	0.00373457	0.737467	1	0.102816	0.102816	0.190481	1	0.000847271	0.000847342	0.734532	1	0.193754	0.193754	0.193754	1	0.00084669	0.000846761	0.734028	1	0.12107	0.185483	0.273148	1
5.5	0.0170098	0.0170099	0.735393	1	0.102816	0.102816	0.190416	1	0.00262084	0.00373457	0.737932	1	0.102816	0.102816	0.190416	1	0.000847273	0.000847342	0.734995	1	0.193754	0.193754	0.193754	1	0.000846669	0.000846739	0.734471	1	0.121715	0.187043	0.274643	1
5.6	0.0170099	0.0170099	0.735865	1	0.102816	0.102816	0.190351	1	0.00265759	0.00373457	0.738398	1	0.102816	0.102816	0.190351	1	0.000847276	0.000847342	0.735458	1	0.193754	0.193754	0.193754	1	0.000846649	0.000846715	0.734914	1	0.122368	0.188602	0.276138	1
5.7	0.0170099	0.0170099	0.736337	1	0.102816	0.102816	0.190286	1	0.00269313	0.00373457	0.738864	1	0.102816	0.102816	0.190286	1	0.000847278	0.000847342	0.735922	1	0.193754	0.193754	0.193754	1	0.000846627	0.000846692	0.735357	1	0.12303	0.190162	0.277633	1
5.8	0.0170099	0.0170099	0.736809	1	0.102816	0.102816	0.190222	1	0.0027275	0.00373457	0.73933	1	0.102816	0.102816	0.190222	1	0.00084728	0.000847342	0.736386	1	0.193754	0.193754	0.193754	1	0.000846606	0.000846668	0.7358	1	0.123702	0.191722	0.279128	1
5.9	0.0170099	0.0170099	0.737282	1	0.102816	0.102816	0.190157	1	0.00276073	0.00373457	0.739796	1	0.102816	0.102816	0.190157	1	0.000847282	0.000847342	0.736851	1	0.193754	0.193754	0.193754	1	0.000846583	0.000846644	0.736243	1	0.124382	0.193282	0.280623	1
6	0.0170099	0.0170099	0.737755	1	0.102816	0.102816	0.190092	1	0.00279287	0.00392705	0.740456	1	0.102816	0.102816	0.190092	1	0.000847284	0.000847342	0.737315	1	0.193754	0.193754	0.193754	1	0.000846561	0.000846619	0.736686	1	0.125071	0.194841	0.282118	1
6.1	0.0170099	0.0170099	0.738228	1	0.102816	0.102816	0.190028	1	0.0028303	0.00392705	0.740923	1	0.102816	0.102816	0.190028	1	0.000847286	0.000847342	0.73778	1	0.193754	0.193754	0.193754	1	0.000846538	0.000846594	0.737129	1	0.125768	0.196401	0.283613	1
6.2	0.0170099	0.0170099	0.738702	1	0.102816	0.102816	0.189963	1	0.00286649	0.00392705	0.74139	1	0.102816	0.102816	0.189963	1	0.000847288	0.000847342	0.738245	1	0.193754	0.193754	0.193754	1	0.000846515	0.000846569	0.737572	1	0.126475	0.197961	0.285109	1
6.3	0.0170099	0.0170099	0.739176	1	0.102816	0.102816	0.189899	1	0.00290149	0.00392705	0.741858	1	0.102816	0.102816	0.189899	1	0.00084729	0.000847342	0.738711	1	0.193754	0.193754	0.193754	1	0.000846491	0.000846544	0.738014	1	0.12719	0.199521	0.286604	1
6.4	0.0170099	0.0170099	0.73965	1	0.102816	0.102816	0.189834	1	0.00293533	0.00392705	0.742326	1	0.102816	0.102816	0.189834	1	0.000847291	0.000847342	0.739177	1	0.193754	0.193754	0.193754	1	0.000846467	0.000846518	0.738457	1	0.127913	0.20108	0.288099	1
6.5	0.0170099	0.0170099	0.740124	1	0.102816	0.102816	0.18977	1	0.00296806	0.00411953	0.742987	1	0.102816	0.102816	0.18977	1	0.000847293	0.000847342	0.739643	1	0.193754	0.193754	0.193754	1	0.000846442	0.000846492	0.7389	1	0.128645	0.20264	0.289594	1
6.6	0.0170099	0.0170099	0.740599	1	0.102816	0.102816	0.189706	1	0.00300606	0.00411953	0.743456	1	0.102816	0.102816	0.189706	1	0.000847295	0.000847342	0.740109	1	0.193754	0.193754	0.193754	1	0.000846417	0.000846465	0.739343	1	0.129385	0.2042	0.29109	1
6.7	0.0170099	0.0170099	0.741074	1	0.102816	0.102816	0.189641	1	0.0030428	0.00411953	0.743925	1	0.102816	0.102816	0.189641	1	0.000847296	0.000847342	0.740576	1	0.193754	0.193754	0.193754	1	0.000846392	0.000846438	0.739786	1	0.130133	0.20576	0.292585	1
6.8	0.0170099	0.0170099	0.741549	1	0.102816	0.102816	0.189577	1	0.00307833	0.00411953	0.744395	1	0.102816	0.102816	0.189577	1	0.000847298	0.000847342	0.741043	1	0.193754	0.193754	0.193754	1	0.000846367	0.000846411	0.740228	1	0.130889	0.207319	0.294081	1
6.9	0.0170099	0.0170099	0.742025	1	0.102816	0.102816	0.189513	1	0.00311269	0.00411953	0.744865	1	0.102816	0.102816	0.189513	1	0.000847299	0.000847342	0.74151	1	0.193754	0.193754	0.193754	1	0.000846341	0.000846384	0.740671	1	0.131653	0.208879	0.295576	1
7	0.0170099	0.0170099	0.742501	1	0.102816	0.102816	0.189449	1	0.00314592	0.00411953	0.745335	1	0.102816	0.102816	0.189449	1	0.000847301	0.000847342	0.741978	1	0.193754	0.193754	0.193754	1	0.000846314	0.000846356	0.741114	1	0.132426	0.210439	0.297072	1
7.1	0.0170099	0.0170099	0.742977	1	0.102816	0.102816	0.189385	1	0.00317805	0.00431201	0.745998	1	0.102816	0.102816	0.189385	1	0.000847302	0.000847342	0.742446	1	0.193754	0.193754	0.193754	1	0.000846288	0.000846328	0.741557	1	0.133206	0.211999	0.298568	1
7.2	0.0170099	0.0170099	0.743454	1	0.102816	0.102816	0.18932	1	0.00321547	0.00431201	0.746469	1	0.102816	0.102816	0.18932	1	0.000847303	0.000847342	0.742914	1	0.193754	0.193754	0.193754	1	0.000846261	0.0008463	0.742	1	0.133994	0.213558	0.300063	1
7.3	0.0170099	0.0170099	0.743931	1	0.102816	0.102816	0.189256	1	0.00325165	0.00431201	0.74694	1	0.102816	0.102816	0.189256	1	0.000847305	0.000847342	0.743382	1	0.193754	0.193754	0.193754	1	0.000846234	0.000846271	0.742443	1	0.134789	0.215118	0.301559	1
7.4	0.0170099	0.0170099	0.744408	1	0.102816	0.102816	0.189193	1	0.00328665	0.00431201	0.747412	1	0.102816	0.102816	0.189193	1	0.000847306	0.000847342	0.743851	1	0.193754	0.193754	0.193754	1	0.000846206	0.000846243	0.742885	1	0.135593	0.216678	0.303055	1
7.5	0.0170099	0.0170099	0.744886	1	0.102816	0.102816	0.189129	1	0.00332048	0.00431201	0.747883	1	0.102816	0.102816	0.189129	1	0.000847307	0.000847342	0.74432	1	0.193754	0.193754	0.193754	1	0.000846178	0.000846214	0.743328	1	0.136403	0.218238	0.304551	1
7.6	0.0170099	0.0170099	0.745363	1	0.102816	0.102816	0.189065	1	0.0033532	0.00450449	0.748548	1	0.102816	0.102816	0.189065	1	0.000847308	0.000847342	0.744789	1	0.193754	0.193754	0.193754	1	0.00084615	0.000846184	0.743771	1	0.137222	0.219797	0.306047	1
7.7	0.0170099	0.0170099	0.745841	1	0.102816	0.102816	0.189001	1	0.0033912	0.00450449	0.749021	1	0.102816	0.102816	0.189001	1	0.000847309	0.000847342	0.745259	1	0.193754	0.193754	0.193754	1	0.000846122	0.000846155	0.744214	1	0.138048	0.221357	0.307543	1
7.8	0.0170099	0.0170099	0.74632	1	0.102816	0.102816	0.188937	1	0.00342793	0.00450449	0.749494	1	0.102816	0.102816	0.188937	1	0.00084731	0.000847342	0.745729	1	0.193754	0.193754	0.193754	1	0.000846093	0.000846125	0.744657	1	0.138881	0.222917	0.309039	1
7.9	0.0170099	0.0170099	0.746798	1	0.102816	0.102816	0.188873	1	0.00346346	0.00450449	0.749967	1	0.102816	0.102816	0.188873	1	0.000847312	0.000847342	0.746199	1	0.193754	0.193754	0.193754	1	0.000846064	0.000846095	0.7451	1	0.139721	0.224477	0.310535	1
8	0.0170099	0.0170099	0.747277	1	0.102816	0.102816	0.18881	1	0.00349781	0.00450449	0.75044	1	0.102816	0.102816	0.18881	1	0.000847313	0.000847342	0.74667	1	0.193754	0.193754	0.193754	1	0.000846034	0.000846064	0.745543	1	0.140569	0.226037	0.312031	1
8.1	0.0170099	0.0170099	0.747757	1	0.102816	0.102816	0.188746	1	0.00353103	0.00450449	0.750914	1	0.102816	0.102816	0.188746	1	0.000847314	0.000847342	0.747141	1	0.193754	0.193754	0.193754	1	0.000846005	0.000846033	0.745986	1	0.141423	0.227596	0.313527	1
8.2	0.0170099	0.0170099	0.748236	1	0.102816	0.102816	0.188682	1	0.00356316	0.00469697	0.751581	1	0.102816	0.102816	0.188682	1	0.000847314	0.000847342	0.747612	1	0.193754	0.193754	0.193754	1	0.000845975	0.000846003	0.746429	1	0.142285	0.229156	0.315023	1
8.3	0.0170099	0.0170099	0.748716	1	0.102816	0.102816	0.188619	1	0.00360057	0.00469697	0.752055	1	0.102816	0.102816	0.188619	1	0.000847315	0.000847342	0.748083	1	0.193754	0.193754	0.193754	1	0.000845944	0.000845971	0.746873	1	0.143154	0.230716	0.316519	1
8.4	0.0170099	0.0170099	0.749196	1	0.102816	0.102816	0.188555	1	0.00363676	0.00469697	0.75253	1	0.102816	0.102816	0.188555	1	0.000847316	0.000847342	0.748555	1	0.193754	0.193754	0.193754	1	0.000845914	0.00084594	0.747316	1	0.144029	0.232276	0.318015	1
8.5	0.0170099	0.0170099	0.749677	1	0.102816	0.102816	0.188492	1	0.00367174	0.00469697	0.753006	1	0.102816	0.102816	0.188492	1	0.000847317	0.000847342	0.749027	1	0.193754	0.193754	0.193754	1	0.000845883	0.000845908	0.747759	1	0.144912	0.233835	0.319512	1
8.6	0.0170099	0.0170099	0.750158	1	0.102816	0.102816	0.188429	1	0.00370558	0.00469697	0.753481	1	0.102816	0.102816	0.188429	1	0.000847318	0.000847342	0.749499	1	0.193754	0.193754	0.193754	1	0.000845852	0.000845877	0.748203	1	0.145801	0.235395	0.321008	1
8.7	0.0170099	0.0170099	0.750639	1	0.102816	0.102816	0.188365	1	0.00373829	0.00488946	0.75415	1	0.102816	0.102816	0.188365	1	0.000847319	0.000847342	0.749972	1	0.193754	0.193754	0.193754	1	0.000845821	0.000845845	0.748646	1	0.146697	0.236955	0.322505	1
8.8	0.0170099	0.0170099	0.75112	1	0.102816	0.102816	0.188302	1	0.00377628	0.00488946	0.754626	1	0.102816	0.102816	0.188302	1	0.00084732	0.000847342	0.750445	1	0.193754	0.193754	0.193754	1	0.000845789	0.000845812	0.749089	1	0.147599	0.238515	0.324001	1
8.9	0.0170099	0.0170099	0.751602	1	0.102816	0.102816	0.188239	1	0.00381302	0.00488946	0.755102	1	0.102816	0.102816	0.188239	1	0.00084732	0.000847342	0.750918	1	0.193754	0.193754	0.193754	1	0.000845758	0.00084578	0.749533	1	0.148509	0.240074	0.325497	1
9	0.0170099	0.0170099	0.752084	1	0.102816	0.102816	0.188175	1	0.00384854	0.00488946	0.755579	1	0.102816	0.102816	0.188175	1	0.000847321	0.000847342	0.751391	1	0.193754	0.193754	0.193754	1	0.000845726	0.000845747	0.749977	1	0.149424	0.241634	0.326994	1
9.1	0.0170099	0.0170099	0.752566	1	0.102816	0.102816	0.188112	1	0.00388289	0.00488946	0.756057	1	0.102816	0.102816	0.188112	1	0.000847322	0.000847342	0.751865	1	0.193754	0.193754	0.193754	1	0.000845693	0.000845714	0.75042	1	0.150346	0.243194	0.328491	1
9.2	0.0170099	0.0170099	0.753049	1	0.102816	0.102816	0.188049	1	0.0039161	0.00488946	0.756534	1	0.102816	0.102816	0.188049	1	0.000847322	0.000847342	0.752339	1	0.193754	0.193754	0.193754	1	0.000845661	0.000845681	0.750864	1	0.151275	0.244754	0.329987	1
9.3	0.0170099	0.0170099	0.753532	1	0.102816	0.102816	0.187986	1	0.00394823	0.00508194	0.757205	1	0.102816	0.102816	0.187986	1	0.000847323	0.000847342	0.752814	1	0.193754	0.193754	0.193754	1	0.000845628	0.000845648	0.751308	1	0.15221	0.246313	0.331484	1
9.4	0.0170099	0.0170099	0.754015	1	0.102816	0.102816	0.187923	1	0.00398564	0.00508194	0.757683	1	0.102816	0.102816	0.187923	1	0.000847324	0.000847342	0.753288	1	0.193754	0.193754	0.193754	1	0.000845595	0.000845614	0.751752	1	0.153151	0.247873	0.332981	1
9.5	0.0170099	0.0170099	0.754499	1	0.102816	0.102816	0.18786	1	0.00402182	0.00508194	0.758162	1	0.102816	0.102816	0.18786	1	0.000847324	0.000847342	0.753763	1	0.193754	0.193754	0.193754	1	0.000845562	0.00084558	0.752196	1	0.154098	0.249433	0.334477	1
9.6	0.0170099	0.0170099	0.754982	1	0.102816	0.102816	0.187797	1	0.0040568	0.00508194	0.758641	1	0.102816	0.102816	0.187797	1	0.000847325	0.000847342	0.754239	1	0.193754	0.193754	0.193754	1	0.000845529	0.000845546	0.75264	1	0.155051	0.250993	0.335974	1
9.7	0.0170099	0.0170099	0.755467	1	0.102816	0.102816	0.187734	1	0.00409063	0.00508194	0.75912	1	0.102816	0.102816	0.187734	1	0.000847326	0.000847342	0.754714	1	0.193754	0.193754	0.193754	1	0.000845495	0.000845512	0.753084	1	0.156011	0.252552	0.337471	1
9.8	0.0170099	0.0170099	0.755951	1	0.102816	0.102816	0.187671	1	0.00412334	0.00527442	0.759792	1	0.102816	0.102816	0.187671	1	0.000847326	0.000847342	0.75519	1	0.193754	0.193754	0.193754	1	0.000845461	0.000845478	0.753528	1	0.156976	0.254112	0.338968	1
9.9	0.0170099	0.0170099	0.756436	1	0.102816	0.102816	0.187609	1	0.00416133	0.00527442	0.760272	1	0.102816	0.102816	0.187609	1	0.000847327	0.000847342	0.755666	1	0.193754	0.193754	0.193754	1	0.000845427	0.000845443	0.753973	1	0.157947	0.255672	0.340465	1
10	0.0170099	0.0170099	0.756921	1	0.102816	0.102816	0.187546	1	0.00419806	0.00527442	0.760753	1	0.102816	0.102816	0.187546	1	0.000847327	0.000847342	0.756143	1	0.193754	0.193754	0.193754	1	0.000845393	0.000845408	0.754417	1	0.158925	0.257232	0.341962	1
10.1	0.0170099	0.0170099	0.757406	1	0.102816	0.102816	0.187483	1	0.00423358	0.00527442	0.761233	1	0.102816	0.102816	0.187483	1	0.000847328	0.000847342	0.75662	1	0.193754	0.193754	0.193754	1	0.000845359	0.000845374	0.754861	1	0.159908	0.258791	0.343459	1
10.2	0.0170099	0.0170099	0.757892	1	0.102816	0.102816	0.187421	1	0.00426793	0.00527442	0.761714	1	0.102816	0.102816	0.187421	1	0.000847328	0.000847342	0.757097	1	0.193754	0.193754	0.193754	1	0.000845324	0.000845338	0.755306	1	0.160897	0.260351	0.344956	1
10.3	0.0170099	0.0170099	0.758378	1	0.102816	0.102816	0.187358	1	0.00430114	0.00527442	0.762196	1	0.102816	0.102816	0.187358	1	0.000847329	0.000847342	0.757574	1	0.193754	0.193754	0.193754	1	0.000845289	0.000845303	0.755751	1	0.161891	0.261911	0.346453	1
10.4	0.0170099	0.0170099	0.758864	1	0.102816	0.102816	0.187295	1	0.00433326	0.0054669	0.76287	1	0.102816	0.102816	0.187295	1	0.000847329	0.000847342	0.758052	1	0.193754	0.193754	0.193754	1	0.000845254	0.000845268	0.756196	1	0.162891	0.263471	0.347951	1
10.5	0.0170099	0.0170099	0.759351	1	0.102816	0.102816	0.187233	1	0.00437067	0.0054669	0.763352	1	0.102816	0.102816	0.187233	1	0.00084733	0.000847342	0.75853	1	0.193754	0.193754	0.193754	1	0.000845219	0.000845232	0.756641	1	0.163897	0.26503	0.349448	1
10.6	0.0170099	0.0170099	0.759838	1	0.102816	0.102816	0.18717	1	0.00440685	0.0054669	0.763834	1	0.102816	0.102816	0.18717	1	0.00084733	0.000847342	0.759008	1	0.193754	0.193754	0.193754	1	0.000845184	0.000845196	0.757086	1	0.164908	0.26659	0.350945	1
10.7	0.0170099	0.0170099	0.760325	1	0.102816	0.102816	0.187108	1	0.00444183	0.0054669	0.764317	1	0.102816	0.102816	0.187108	1	0.00084733	0.000847342	0.759487	1	0.193754	0.193754	0.193754	1	0.000845148	0.00084516	0.757531	1	0.165925	0.26815	0.352442	1
10.8	0.0170099	0.0170099	0.760812	1	0.102816	0.102816	0.187046	1	0.00447565	0.0054669	0.7648	1	0.102816	0.102816	0.187046	1	0.000847331	0.000847342	0.759966	1	0.193754	0.193754	0.193754	1	0.000845113	0.000845124	0.757976	1	0.166948	0.26971	0.35394	1
10.9	0.0170099	0.0170099	0.7613	1	0.102816	0.102816	0.186983	1	0.00450837	0.00565938	0.765476	1	0.102816	0.102816	0.186983	1	0.000847331	0.000847342	0.760445	1	0.193754	0.193754	0.193754	1	0.000845077	0.000845088	0.758422	1	0.167975	0.27127	0.355437	1
11	0.0170099	0.0170099	0.761788	1	0.102816	0.102816	0.186921	1	0.00454635	0.00565938	0.76596	1	0.102816	0.102816	0.186921	1	0.000847332	0.000847342	0.760924	1	0.193754	0.193754	0.193754	1	0.000845041	0.000845052	0.758867	1	0.169008	0.272829	0.356935	1
11.1	0.0170099	0.0170099	0.762277	1	0.102816	0.102816	0.186859	1	0.00458308	0.00565938	0.766444	1	0.102816	0.102816	0.186859	1	0.000847332	0.000847342	0.761404	1	0.193754	0.193754	0.193754	1	0.000845005	0.000845015	0.759313	1	0.170046	0.274389	0.358432	1
11.2	0.0170099	0.0170099	0.762765	1	0.102816	0.102816	0.186797	1	0.0046186	0.00565938	0.766928	1	0.102816	0.102816	0.186797	1	0.000847332	0.000847342	0.761884	1	0.193754	0.193754	0.193754	1	0.000844968	0.000844978	0.759759	1	0.17109	0.275949	0.35993	1
11.3	0.0170099	0.0170099	0.763254	1	0.102816	0.102816	0.186734	1	0.00465294	0.00565938	0.767413	1	0.102816	0.102816	0.186734	1	0.000847333	0.000847342	0.762365	1	0.193754	0.193754	0.193754	1	0.000844932	0.000844942	0.760204	1	0.172138	0.277509	0.361427	1
11.4	0.0170099	0.0170099	0.763744	1	0.102816	0.102816	0.186672	1	0.00468616	0.00565938	0.767898	1	0.102816	0.102816	0.186672	1	0.000847333	0.000847342	0.762845	1	0.193754	0.193754	0.193754	1	0.000844895	0.000844905	0.760651	1	0.173192	0.279068	0.362925	1
11.5	0.0170099	0.0170099	0.764234	1	0.102816	0.102816	0.18661	1	0.00471827	0.00585186	0.768576	1	0.102816	0.102816	0.18661	1	0.000847333	0.000847342	0.763326	1	0.193754	0.193754	0.193754	1	0.000844858	0.000844867	0.761097	1	0.174251	0.280628	0.364423	1
11.6	0.0170099	0.0170099	0.764723	1	0.102816	0.102816	0.186548	1	0.00475568	0.00585186	0.769062	1	0.102816	0.102816	0.186548	1	0.000847334	0.000847342	0.763808	1	0.193754	0.193754	0.193754	1	0.000844821	0.00084483	0.761543	1	0.175315	0.282188	0.365921	1
11.7	0.0170099	0.0170099	0.765214	1	0.102816	0.102816	0.186486	1	0.00479185	0.00585186	0.769548	1	0.102816	0.102816	0.186486	1	0.000847334	0.000847342	0.764289	1	0.193754	0.193754	0.193754	1	0.000844784	0.000844793	0.761989	1	0.176383	0.283748	0.367418	1
11.8	0.0170099	0.0170099	0.765704	1	0.102816	0.102816	0.186424	1	0.00482684	0.00585186	0.770035	1	0.102816	0.102816	0.186424	1	0.000847334	0.000847342	0.764771	1	0.193754	0.193754	0.193754	1	0.000844747	0.000844755	0.762436	1	0.177457	0.285307	0.368916	1
11.9	0.0170099	0.0170099	0.766195	1	0.102816	0.102816	0.186362	1	0.00486066	0.00585186	0.770522	1	0.102816	0.102816	0.186362	1	0.000847334	0.000847342	0.765253	1	0.193754	0.193754	0.193754	1	0.000844709	0.000844718	0.762883	1	0.178535	0.286867	0.370414	1
12	0.0170099	0.0170099	0.766686	1	0.102816	0.102816	0.186301	1	0.00489337	0.00604435	0.771202	1	0.102816	0.102816	0.186301	1	0.000847335	0.000847342	0.765736	1	0.193754	0.193754	0.193754	1	0.000844672	0.00084468	0.76333	1	0.179619	0.288427	0.371912	1
12.1	0.0170099	0.0170099	0.767178	1	0.102816	0.102816	0.186239	1	0.00493135	0.00604435	0.771689	1	0.102816	0.102816	0.186239	1	0.000847335	0.000847342	0.766219	1	0.193754	0.193754	0.193754	1	0.000844634	0.000844642	0.763777	1	0.180707	0.289987	0.37341	1
12.2	0.0170099	0.0170099	0.76767	1	0.102816	0.102816	0.186177	1	0.00496808	0.00604435	0.772177	1	0.102816	0.102816	0.186177	1	0.000847335	0.000847342	0.766702	1	0.193754	0.193754	0.193754	1	0.000844596	0.000844604	0.764224	1	0.1818	0.291546	0.374908	1
12.3	0.0170099	0.0170099	0.768162	1	0.102816	0.102816	0.186115	1	0.0050036	0.00604435	0.772665	1	0.102816	0.102816	0.186115	1	0.000847335	0.000847342	0.767185	1	0.193754	0.193754	0.193754	1	0.000844559	0.000844566	0.764671	1	0.182897	0.293106	0.376406	1
12.4	0.0170099	0.0170099	0.768654	1	0.102816	0.102816	0.186054	1	0.00503794	0.00604435	0.773154	1	0.102816	0.102816	0.186054	1	0.000847336	0.000847342	0.767669	1	0.193754	0.193754	0.193754	1	0.00084452	0.000844527	0.765119	1	0.183999	0.294666	0.377904	1
12.5	0.0170099	0.0170099	0.769147	1	0.102816	0.102816	0.185992	1	0.00507115	0.00604435	0.773643	1	0.102816	0.102816	0.185992	1	0.000847336	0.000847342	0.768153	1	0.193754	0.193754	0.193754	1	0.000844482	0.000844489	0.765566	1	0.185106	0.296226	0.379402	1
12.6	0.0170099	0.0170099	0.76964	1	0.102816	0.102816	0.185931	1	0.00510327	0.00623683	0.774325	1	0.102816	0.102816	0.185931	1	0.000847336	0.000847342	0.768638	1	0.193754	0.193754	0.193754	1	0.000844444	0.00084445	0.766014	1	0.186217	0.297785	0.380901	1
12.7	0.0170099	0.0170099	0.770134	1	0.102816	0.102816	0.185869	1	0.00514068	0.00623683	0.774814	1	0.102816	0.102816	0.185869	1	0.000847336	0.000847342	0.769122	1	0.193754	0.193754	0.193754	1	0.000844406	0.000844412	0.766462	1	0.187333	0.299345	0.382399	1
12.8	0.0170099	0.0170099	0.770627	1	0.102816	0.102816	0.185808	1	0.00517685	0.00623683	0.775304	1	0.102816	0.102816	0.185808	1	0.000847336	0.000847342	0.769607	1	0.193754	0.193754	0.193754	1	0.000844367	0.000844373	0.76691	1	0.188453	0.300905	0.383897	1
12.9	0.0170099	0.0170099	0.771121	1	0.102816	0.102816	0.185746	1	0.00521183	0.00623683	0.775795	1	0.102816	0.102816	0.185746	1	0.000847337	0.000847342	0.770092	1	0.193754	0.193754	0.193754	1	0.000844328	0.000844334	0.767358	1	0.189577	0.302465	0.385395	1
13	0.0170099	0.0170099	0.771616	1	0.102816	0.102816	0.185685	1	0.00524565	0.00623683	0.776286	1	0.102816	0.102816	0.185685	1	0.000847337	0.000847342	0.770578	1	0.193754	0.193754	0.193754	1	0.00084429	0.000844295	0.767807	1	0.190706	0.304024	0.386894	1
13.1	0.0170099	0.0170099	0.77211	1	0.102816	0.102816	0.185624	1	0.00527836	0.00642931	0.776969	1	0.102816	0.102816	0.185624	1	0.000847337	0.000847342	0.771064	1	0.193754	0.193754	0.193754	1	0.000844251	0.000844256	0.768255	1	0.191839	0.305584	0.388392	1
13.2	0.0170099	0.0170099	0.772605	1	0.102816	0.102816	0.185562	1	0.00531634	0.00642931	0.77746	1	0.102816	0.102816	0.185562	1	0.000847337	0.000847342	0.77155	1	0.193754	0.193754	0.193754	1	0.000844212	0.000844217	0.768704	1	0.192977	0.307144	0.389891	1
13.3	0.0170099	0.0170099	0.7731	1	0.102816	0.102816	0.185501	1	0.00535307	0.00642931	0.777952	1	0.102816	0.102816	0.185501	1	0.000847337	0.000847342	0.772037	1	0.193754	0.193754	0.193754	1	0.000844173	0.000844178	0.769153	1	0.194119	0.308704	0.391389	1
13.4	0.0170099	0.0170099	0.773596	1	0.102816	0.102816	0.18544	1	0.00538859	0.00642931	0.778444	1	0.102816	0.102816	0.18544	1	0.000847338	0.000847342	0.772523	1	0.193754	0.193754	0.193754	1	0.000844134	0.000844138	0.769602	1	0.195264	0.310263	0.392888	1
13.5	0.0170099	0.0170099	0.774092	1	0.102816	0.102816	0.185379	1	0.00542293	0.00642931	0.778937	1	0.102816	0.102816	0.185379	1	0.000847338	0.000847342	0.773011	1	0.193754	0.193754	0.193754	1	0.000844094	0.000844099	0.770052	1	0.196414	0.311823	0.394386	1
13.6	0.0170099	0.0170099	0.774588	1	0.102816	0.102816	0.185318	1	0.00545614	0.00642931	0.77943	1	0.102816	0.102816	0.185318	1	0.000847338	0.000847342	0.773498	1	0.193754	0.193754	0.193754	1	0.000844055	0.00084406	0.770501	1	0.197569	0.313383	0.395885	1
13.7	0.0170099	0.0170099	0.775084	1	0.102816	0.102816	0.185257	1	0.00548826	0.00662179	0.780115	1	0.102816	0.102816	0.185257	1	0.000847338	0.000847342	0.773986	1	0.193754	0.193754	0.193754	1	0.000844016	0.00084402	0.770951	1	0.198727	0.314943	0.397384	1
13.8	0.0170099	0.0170099	0.775581	1	0.102816	0.102816	0.185196	1	0.00552566	0.00662179	0.780609	1	0.102816	0.102816	0.185196	1	0.000847338	0.000847342	0.774474	1	0.193754	0.193754	0.193754	1	0.000843976	0.00084398	0.771401	1	0.199889	0.316503	0.398883	1
13.9	0.0170099	0.0170099	0.776078	1	0.102816	0.102816	0.185135	1	0.00556184	0.00662179	0.781103	1	0.102816	0.102816	0.185135	1	0.000847338	0.000847342	0.774962	1	0.193754	0.193754	0.193754	1	0.000843936	0.000843941	0.771851	1	0.201055	0.318062	0.400381	1
14	0.0170099	0.0170099	0.776576	1	0.102816	0.102816	0.185074	1	0.00559681	0.00662179	0.781597	1	0.102816	0.102816	0.185074	1	0.000847338	0.000847342	0.775451	1	0.193754	0.193754	0.193754	1	0.000843897	0.000843901	0.772301	1	0.202225	0.319622	0.40188	1
14.1	0.0170099	0.0170099	0.777074	1	0.102816	0.102816	0.185013	1	0.00563064	0.00662179	0.782091	1	0.102816	0.102816	0.185013	1	0.000847339	0.000847342	0.77594	1	0.193754	0.193754	0.193754	1	0.000843857	0.000843861	0.772751	1	0.203399	0.321182	0.403379	1
14.2	0.0170099	0.0170099	0.777572	1	0.102816	0.102816	0.184952	1	0.00566335	0.00681427	0.782779	1	0.102816	0.102816	0.184952	1	0.000847339	0.000847342	0.776429	1	0.193754	0.193754	0.193754	1	0.000843817	0.000843821	0.773202	1	0.204577	0.322742	0.404878	1
14.3	0.0170099	0.0170099	0.77807	1	0.102816	0.102816	0.184891	1	0.00570133	0.00681427	0.783274	1	0.102816	0.102816	0.184891	1	0.000847339	0.000847342	0.776918	1	0.193754	0.193754	0.193754	1	0.000843777	0.000843781	0.773653	1	0.205758	0.324301	0.406377	1
14.4	0.0170099	0.0170099	0.778569	1	0.102816	0.102816	0.184831	1	0.00573805	0.00681427	0.78377	1	0.102816	0.102816	0.184831	1	0.000847339	0.000847342	0.777408	1	0.193754	0.193754	0.193754	1	0.000843737	0.000843741	0.774104	1	0.206944	0.325861	0.407876	1
14.5	0.0170099	0.0170099	0.779068	1	0.102816	0.102816	0.18477	1	0.00577357	0.00681427	0.784266	1	0.102816	0.102816	0.18477	1	0.000847339	0.000847342	0.777899	1	0.193754	0.193754	0.193754	1	0.000843697	0.0008437	0.774555	1	0.208133	0.327421	0.409375	1
14.6	0.0170099	0.0170099	0.779567	1	0.102816	0.102816	0.184709	1	0.00580791	0.00681427	0.784762	1	0.102816	0.102816	0.184709	1	0.000847339	0.000847342	0.778389	1	0.193754	0.193754	0.193754	1	0.000843657	0.00084366	0.775006	1	0.209326	0.328981	0.410874	1
14.7	0.0170099	0.0170099	0.780067	1	0.102816	0.102816	0.184649	1	0.00584112	0.00681427	0.785259	1	0.102816	0.102816	0.184649	1	0.000847339	0.000847342	0.77888	1	0.193754	0.193754	0.193754	1	0.000843617	0.00084362	0.775458	1	0.210522	0.33054	0.412373	1
14.8	0.0170099	0.0170099	0.780567	1	0.102816	0.102816	0.184588	1	0.00587324	0.00700675	0.785948	1	0.102816	0.102816	0.184588	1	0.000847339	0.000847342	0.779371	1	0.193754	0.193754	0.193754	1	0.000843576	0.000843579	0.77591	1	0.211723	0.3321	0.413873	1
14.9	0.0170099	0.0170099	0.781067	1	0.102816	0.102816	0.184528	1	0.00591064	0.00700675	0.786445	1	0.102816	0.102816	0.184528	1	0.000847339	0.000847342	0.779862	1	0.193754	0.193754	0.193754	1	0.000843536	0.000843539	0.776362	1	0.212926	0.33366	0.415372	1
15	0.0170099	0.0170099	0.781567	1	0.102816	0.102816	0.184467	1	0.00594681	0.00700675	0.786943	1	0.102816	0.102816	0.184467	1	0.00084734	0.000847342	0.780354	1	0.193754	0.193754	0.193754	1	0.000843495	0.000843498	0.776814	1	0.214134	0.33522	0.416871	1
15.1	0.0170099	0.0170099	0.782068	1	0.102816	0.102816	0.184407	1	0.00598179	0.00700675	0.787441	1	0.102816	0.102816	0.184407	1	0.00084734	0.000847342	0.780846	1	0.193754	0.193754	0.193754	1	0.000843455	0.000843458	0.777266	1	0.215345	0.336779	0.41837	1
15.2	0.0170099	0.0170099	0.78257	1	0.102816	0.102816	0.184346	1	0.00601562	0.00700675	0.78794	1	0.102816	0.102816	0.184346	1	0.00084734	0.000847342	0.781339	1	0.193754	0.193754	0.193754	1	0.000843414	0.000843417	0.777719	1	0.216559	0.338339	0.41987	1
15.3	0.0170099	0.0170099	0.783071	1	0.102816	0.102816	0.184286	1	0.00604832	0.00719923	0.788631	1	0.102816	0.102816	0.184286	1	0.00084734	0.000847342	0.781831	1	0.193754	0.193754	0.193754	1	0.000843374	0.000843376	0.778172	1	0.217777	0.339899	0.421369	1
15.4	0.0170099	0.0170099	0.783573	1	0.102816	0.102816	0.184226	1	0.0060863	0.00719923	0.78913	1	0.102816	0.102816	0.184226	1	0.00084734	0.000847342	0.782324	1	0.193754	0.193754	0.193754	1	0.000843333	0.000843336	0.778625	1	0.218998	0.341459	0.422869	1
15.5	0.0170099	0.0170099	0.784075	1	0.102816	0.102816	0.184165	1	0.00612303	0.00719923	0.78963	1	0.102816	0.102816	0.184165	1	0.00084734	0.000847342	0.782817	1	0.193754	0.193754	0.193754	1	0.000843292	0.000843295	0.779078	1	0.220223	0.343018	0.424368	1
15.6	0.0170099	0.0170099	0.784578	1	0.102816	0.102816	0.184105	1	0.00615854	0.00719923	0.790129	1	0.102816	0.102816	0.184105	1	0.00084734	0.000847342	0.783311	1	0.193754	0.193754	0.193754	1	0.000843252	0.000843254	0.779532	1	0.221451	0.344578	0.425868	1
15.7	0.0170099	0.0170099	0.78508	1	0.102816	0.102816	0.184045	1	0.00619289	0.00719923	0.79063	1	0.102816	0.102816	0.184045	1	0.00084734	0.000847342	0.783805	1	0.193754	0.193754	0.193754	1	0.000843211	0.000843213	0.779985	1	0.222682	0.346138	0.427367	1
15.8	0.0170099	0.0170099	0.785583	1	0.102816	0.102816	0.183985	1	0.0062261	0.00719923	0.79113	1	0.102816	0.102816	0.183985	1	0.00084734	0.000847342	0.784299	1	0.193754	0.193754	0.193754	1	0.00084317	0.000843172	0.780439	1	0.223916	0.347698	0.428867	1
15.9	0.0170099	0.0170099	0.786087	1	0.102816	0.102816	0.183925	1	0.00625821	0.00739172	0.791824	1	0.102816	0.102816	0.183925	1	0.00084734	0.000847342	0.784794	1	0.193754	0.193754	0.193754	1	0.000843129	0.000843131	0.780893	1	0.225154	0.349257	0.430367	1
16	0.0170099	0.0170099	0.786591	1	0.102816	0.102816	0.183865	1	0.00629562	0.00739172	0.792325	1	0.102816	0.102816	0.183865	1	0.00084734	0.000847342	0.785289	1	0.193754	0.193754	0.193754	1	0.000843088	0.00084309	0.781348	1	0.226395	0.350817	0.431867	1
16.1	0.0170099	0.0170099	0.787095	1	0.102816	0.102816	0.183805	1	0.00633179	0.00739172	0.792827	1	0.102816	0.102816	0.183805	1	0.00084734	0.000847342	0.785784	1	0.193754	0.193754	0.193754	1	0.000843047	0.000843049	0.781802	1	0.227639	0.352377	0.433366	1
16.2	0.0170099	0.0170099	0.787599	1	0.102816	0.102816	0.183745	1	0.00636676	0.00739172	0.793328	1	0.102816	0.102816	0.183745	1	0.000847341	0.000847342	0.786279	1	0.193754	0.193754	0.193754	1	0.000843006	0.000843008	0.782257	1	0.228887	0.353937	0.434866	1
16.3	0.0170099	0.0170099	0.788104	1	0.102816	0.102816	0.183685	1	0.00640059	0.00739172	0.793831	1	0.102816	0.102816	0.183685	1	0.000847341	0.000847342	0.786775	1	0.193754	0.193754	0.193754	1	0.000842965	0.000842967	0.782712	1	0.230137	0.355497	0.436366	1
16.4	0.0170099	0.0170099	0.788609	1	0.102816	0.102816	0.183625	1	0.0064333	0.0075842	0.794526	1	0.102816	0.102816	0.183625	1	0.000847341	0.000847342	0.787271	1	0.193754	0.193754	0.193754	1	0.000842924	0.000842926	0.783167	1	0.231391	0.357056	0.437866	1
16.5	0.0170099	0.0170099	0.789114	1	0.102816	0.102816	0.183565	1	0.00647128	0.0075842	0.795029	1	0.102816	0.102816	0.183565	1	0.000847341	0.000847342	0.787767	1	0.193754	0.193754	0.193754	1	0.000842883	0.000842884	0.783623	1	0.232648	0.358616	0.439366	1
16.6	0.0170099	0.0170099	0.78962	1	0.102816	0.102816	0.183506	1	0.006508	0.0075842	0.795532	1	0.102816	0.102816	0.183506	1	0.000847341	0.000847342	0.788264	1	0.193754	0.193754	0.193754	1	0.000842842	0.000842843	0.784079	1	0.233907	0.360176	0.440866	1
16.7	0.0170099	0.0170099	0.790126	1	0.102816	0.102816	0.183446	1	0.00654352	0.0075842	0.796036	1	0.102816	0.102816	0.183446	1	0.000847341	0.000847342	0.788761	1	0.193754	0.193754	0.193754	1	0.0008428	0.000842802	0.784535	1	0.23517	0.361736	0.442366	1
16.8	0.0170099	0.0170099	0.790632	1	0.102816	0.102816	0.183386	1	0.00657786	0.0075842	0.79654	1	0.102816	0.102816	0.183386	1	0.000847341	0.000847342	0.789259	1	0.193754	0.193754	0.193754	1	0.000842759	0.000842761	0.784991	1	0.236436	0.363295	0.443866	1
16.9	0.0170099	0.0170099	0.791139	1	0.102816	0.102816	0.183327	1	0.00661107	0.0075842	0.797045	1	0.102816	0.102816	0.183327	1	0.000847341	0.000847342	0.789756	1	0.193754	0.193754	0.193754	1	0.000842718	0.000842719	0.785447	1	0.237704	0.364855	0.445366	1
17	0.0170099	0.0170099	0.791646	1	0.102816	0.102816	0.183267	1	0.00664318	0.00777668	0.797742	1	0.102816	0.102816	0.183267	1	0.000847341	0.000847342	0.790254	1	0.193754	0.193754	0.193754	1	0.000842677	0.000842678	0.785904	1	0.238976	0.366415	0.446866	1
17.1	0.0170099	0.0170099	0.792153	1	0.102816	0.102816	0.183208	1	0.00668059	0.00777668	0.798247	1	0.102816	0.102816	0.183208	1	0.000847341	0.000847342	0.790752	1	0.193754	0.193754	0.193754	1	0.000842635	0.000842637	0.786361	1	0.24025	0.367975	0.448367	1
17.2	0.0170099	0.0170099	0.79266	1	0.102816	0.102816	0.183148	1	0.00671676	0.00777668	0.798753	1	0.102816	0.102816	0.183148	1	0.000847341	0.000847342	0.791251	1	0.193754	0.193754	0.193754	1	0.000842594	0.000842595	0.786818	1	0.241527	0.369534	0.449867	1
17.3	0.0170099	0.0170099	0.793168	1	0.102816	0.102816	0.183089	1	0.00675174	0.00777668	0.799259	1	0.102816	0.102816	0.183089	1	0.000847341	0.000847342	0.79175	1	0.193754	0.193754	0.193754	1	0.000842553	0.000842554	0.787276	1	0.242807	0.371094	0.451367	1
17.4	0.0170099	0.0170099	0.793676	1	0.102816	0.102816	0.183029	1	0.00678556	0.00777668	0.799765	1	0.102816	0.102816	0.183029	1	0.000847341	0.000847342	0.792249	1	0.193754	0.193754	0.193754	1	0.000842511	0.000842512	0.787733	1	0.24409	0.372654	0.452868	1
17.5	0.0170099	0.0170099	0.794185	1	0.102816	0.102816	0.18297	1	0.00681827	0.00796916	0.800464	1	0.102816	0.102816	0.18297	1	0.000847341	0.000847342	0.792749	1	0.193754	0.193754	0.193754	1	0.00084247	0.000842471	0.788191	1	0.245376	0.374214	0.454368	1
17.6	0.0170099	0.0170099	0.794694	1	0.102816	0.102816	0.182911	1	0.00685624	0.00796916	0.800971	1	0.102816	0.102816	0.182911	1	0.000847341	0.000847342	0.793249	1	0.193754	0.193754	0.193754	1	0.000842428	0.000842429	0.788649	1	0.246664	0.375773	0.455868	1
17.7	0.0170099	0.0170099	0.795203	1	0.102816	0.102816	0.182851	1	0.00689297	0.00796916	0.801478	1	0.102816	0.102816	0.182851	1	0.000847341	0.000847342	0.793749	1	0.193754	0.193754	0.193754	1	0.000842387	0.000842388	0.789108	1	0.247955	0.377333	0.457369	1
17.8	0.0170099	0.0170099	0.795712	1	0.102816	0.102816	0.182792	1	0.00692849	0.00796916	0.801986	1	0.102816	0.102816	0.182792	1	0.000847341	0.000847342	0.794249	1	0.193754	0.193754	0.193754	1	0.000842345	0.000842347	0.789566	1	0.249249	0.378893	0.458869	1
17.9	0.0170099	0.0170099	0.796222	1	0.102816	0.102816	0.182733	1	0.00696283	0.00796916	0.802494	1	0.102816	0.102816	0.182733	1	0.000847341	0.000847342	0.79475	1	0.193754	0.193754	0.193754	1	0.000842304	0.000842305	0.790025	1	0.250546	0.380453	0.46037	1
18	0.0170099	0.0170099	0.796732	1	0.102816	0.102816	0.182674	1	0.00699604	0.00796916	0.803003	1	0.102816	0.102816	0.182674	1	0.000847341	0.000847342	0.795251	1	0.193754	0.193754	0.193754	1	0.000842262	0.000842263	0.790484	1	0.251845	0.382012	0.461871	1
18.1	0.0170099	0.0170099	0.797243	1	0.102816	0.102816	0.182615	1	0.00702815	0.00816164	0.803704	1	0.102816	0.102816	0.182615	1	0.000847341	0.000847342	0.795753	1	0.193754	0.193754	0.193754	1	0.000842221	0.000842222	0.790944	1	0.253146	0.383572	0.463371	1
18.2	0.0170099	0.0170099	0.797754	1	0.102816	0.102816	0.182556	1	0.00706556	0.00816164	0.804213	1	0.102816	0.102816	0.182556	1	0.000847341	0.000847342	0.796254	1	0.193754	0.193754	0.193754	1	0.000842179	0.00084218	0.791404	1	0.254451	0.385132	0.464872	1
18.3	0.0170099	0.0170099	0.798265	1	0.102816	0.102816	0.182497	1	0.00710173	0.00816164	0.804722	1	0.102816	0.102816	0.182497	1	0.000847341	0.000847342	0.796756	1	0.193754	0.193754	0.193754	1	0.000842138	0.000842139	0.791864	1	0.255757	0.386692	0.466373	1
18.4	0.0170099	0.0170099	0.798776	1	0.102816	0.102816	0.182438	1	0.0071367	0.00816164	0.805232	1	0.102816	0.102816	0.182438	1	0.000847342	0.000847342	0.797259	1	0.193754	0.193754	0.193754	1	0.000842096	0.000842097	0.792324	1	0.257067	0.388251	0.467873	1
18.5	0.0170099	0.0170099	0.799288	1	0.102816	0.102816	0.182379	1	0.00717053	0.00816164	0.805743	1	0.102816	0.102816	0.182379	1	0.000847342	0.000847342	0.797762	1	0.193754	0.193754	0.193754	1	0.000842055	0.000842056	0.792784	1	0.258379	0.389811	0.469374	1
18.6	0.0170099	0.0170099	0.7998	1	0.102816	0.102816	0.18232	1	0.00720323	0.00835412	0.806446	1	0.102816	0.102816	0.18232	1	0.000847342	0.000847342	0.798265	1	0.193754	0.193754	0.193754	1	0.000842013	0.000842014	0.793245	1	0.259693	0.391371	0.470875	1
18.7	0.0170099	0.0170099	0.800312	1	0.102816	0.102816	0.182261	1	0.00724121	0.00835412	0.806957	1	0.102816	0.102816	0.182261	1	0.000847342	0.000847342	0.798768	1	0.193754	0.193754	0.193754	1	0.000841972	0.000841973	0.793706	1	0.26101	0.392931	0.472376	1
18.8	0.0170099	0.0170099	0.800825	1	0.102816	0.102816	0.182202	1	0.00727794	0.00835412	0.807468	1	0.102816	0.102816	0.182202	1	0.000847342	0.000847342	0.799272	1	0.193754	0.193754	0.193754	1	0.00084193	0.000841931	0.794167	1	0.262329	0.39449	0.473877	1
18.9	0.0170099	0.0170099	0.801338	1	0.102816	0.102816	0.182143	1	0.00731345	0.00835412	0.80798	1	0.102816	0.102816	0.182143	1	0.000847342	0.000847342	0.799775	1	0.193754	0.193754	0.193754	1	0.000841889	0.00084189	0.794629	1	0.263651	0.39605	0.475378	1
19	0.0170099	0.0170099	0.801851	1	0.102816	0.102816	0.182085	1	0.00734779	0.00835412	0.808492	1	0.102816	0.102816	0.182085	1	0.000847342	0.000847342	0.80028	1	0.193754	0.193754	0.193754	1	0.000841847	0.000841848	0.795091	1	0.264975	0.39761	0.476879	1
19.1	0.0170099	0.0170099	0.802365	1	0.102816	0.102816	0.182026	1	0.007381	0.00835412	0.809004	1	0.102816	0.102816	0.182026	1	0.000847342	0.000847342	0.800784	1	0.193754	0.193754	0.193754	1	0.000841806	0.000841807	0.795553	1	0.266301	0.39917	0.47838	1
19.2	0.0170099	0.0170099	0.802879	1	0.102816	0.102816	0.181967	1	0.00741312	0.00854661	0.809709	1	0.102816	0.102816	0.181967	1	0.000847342	0.000847342	0.801289	1	0.193754	0.193754	0.193754	1	0.000841764	0.000841765	0.796015	1	0.26763	0.40073	0.479881	1
19.3	0.0170099	0.0170099	0.803393	1	0.102816	0.102816	0.181909	1	0.00745052	0.00854661	0.810222	1	0.102816	0.102816	0.181909	1	0.000847342	0.000847342	0.801795	1	0.193754	0.193754	0.193754	1	0.000841723	0.000841723	0.796478	1	0.268961	0.402289	0.481383	1
19.4	0.0170099	0.0170099	0.803908	1	0.102816	0.102816	0.18185	1	0.00748669	0.00854661	0.810736	1	0.102816	0.102816	0.18185	1	0.000847342	0.000847342	0.8023	1	0.193754	0.193754	0.193754	1	0.000841681	0.000841682	0.79694	1	0.270294	0.403849	0.482884	1
19.5	0.0170099	0.0170099	0.804423	1	0.102816	0.102816	0.181792	1	0.00752167	0.00854661	0.81125	1	0.102816	0.102816	0.181792	1	0.000847342	0.000847342	0.802806	1	0.193754	0.193754	0.193754	1	0.00084164	0.00084164	0.797404	1	0.271629	0.405409	0.484385	1
19.6	0.0170099	0.0170099	0.804938	1	0.102816	0.102816	0.181733	1	0.00755549	0.00854661	0.811764	1	0.102816	0.102816	0.181733	1	0.000847342	0.000847342	0.803312	1	0.193754	0.193754	0.193754	1	0.000841598	0.000841599	0.797867	1	0.272967	0.406969	0.485886	1
19.7	0.0170099	0.0170099	0.805454	1	0.102816	0.102816	0.181675	1	0.0075882	0.00873909	0.812471	1	0.102816	0.102816	0.181675	1	0.000847342	0.000847342	0.803819	1	0.193754	0.193754	0.193754	1	0.000841557	0.000841557	0.798331	1	0.274307	0.408528	0.487388	1
19.8	0.0170099	0.0170099	0.80597	1	0.102816	0.102816	0.181617	1	0.00762618	0.00873909	0.812986	1	0.102816	0.102816	0.181617	1	0.000847342	0.000847342	0.804325	1	0.193754	0.193754	0.193754	1	0.000841515	0.000841516	0.798795	1	0.275649	0.410088	0.488889	1
19.9	0.0170099	0.0170099	0.806486	1	0.102816	0.102816	0.181558	1	0.0076629	0.00873909	0.813501	1	0.102816	0.102816	0.181558	1	0.000847342	0.000847342	0.804833	1	0.193754	0.193754	0.193754	1	0.000841474	0.000841475	0.799259	1	0.276994	0.411648	0.490391	1
20	0.0170099	0.0170099	0.807003	1	0.102816	0.102816	0.1815	1	0.00769842	0.00873909	0.814017	1	0.102816	0.102816	0.1815	1	0.000847342	0.000847342	0.80534	1	0.193754	0.193754	0.193754	1	0.000841433	0.000841433	0.799724	1	0.27834	0.413208	0.491892	1
20.1	0.0170099	0.0170099	0.80752	1	0.102816	0.102816	0.181442	1	0.00773276	0.00873909	0.814533	1	0.102816	0.102816	0.181442	1	0.000847342	0.000847342	0.805848	1	0.193754	0.193754	0.193754	1	0.000841391	0.000841392	0.800188	1	0.279689	0.414767	0.493394	1
20.2	0.0170099	0.0170099	0.808037	1	0.102816	0.102816	0.181384	1	0.00776597	0.00873909	0.815049	1	0.102816	0.102816	0.181384	1	0.000847342	0.000847342	0.806356	1	0.193754	0.193754	0.193754	1	0.00084135	0.00084135	0.800654	1	0.28104	0.416327	0.494895	1
20.3	0.0170099	0.0170099	0.808554	1	0.102816	0.102816	0.181326	1	0.00779808	0.00893157	0.815758	1	0.102816	0.102816	0.181326	1	0.000847342	0.000847342	0.806864	1	0.193754	0.193754	0.193754	1	0.000841308	0.000841309	0.801119	1	0.282393	0.417887	0.496397	1
20.4	0.0170099	0.0170099	0.809072	1	0.102816	0.102816	0.181267	1	0.00783549	0.00893157	0.816275	1	0.102816	0.102816	0.181267	1	0.000847342	0.000847342	0.807373	1	0.193754	0.193754	0.193754	1	0.000841267	0.000841267	0.801585	1	0.283748	0.419447	0.497899	1
20.5	0.0170099	0.0170099	0.80959	1	0.102816	0.102816	0.181209	1	0.00787166	0.00893157	0.816793	1	0.102816	0.102816	0.181209	1	0.000847342	0.000847342	0.807882	1	0.193754	0.193754	0.193754	1	0.000841226	0.000841226	0.802051	1	0.285105	0.421006	0.4994	1
20.6	0.0170099	0.0170099	0.810109	1	0.102816	0.102816	0.181151	1	0.00790664	0.00893157	0.817311	1	0.102816	0.102816	0.181151	1	0.000847342	0.000847342	0.808392	1	0.193754	0.193754	0.193754	1	0.000841184	0.000841185	0.802517	1	0.286464	0.422566	0.500902	1
20.7	0.0170099	0.0170099	0.810628	1	0.102816	0.102816	0.181093	1	0.00794046	0.00893157	0.817829	1	0.102816	0.102816	0.181093	1	0.000847342	0.000847342	0.808901	1	0.193754	0.193754	0.193754	1	0.000841143	0.000841143	0.802984	1	0.287825	0.424126	0.502404	1
20.8	0.0170099	0.0170099	0.811147	1	0.102816	0.102816	0.181035	1	0.00797316	0.00912405	0.81854	1	0.102816	0.102816	0.181035	1	0.000847342	0.000847342	0.809411	1	0.193754	0.193754	0.193754	1	0.000841102	0.000841102	0.80345	1	0.289188	0.425686	0.503906	1
20.9	0.0170099	0.0170099	0.811667	1	0.102816	0.102816	0.180978	1	0.00801114	0.00912405	0.819059	1	0.102816	0.102816	0.180978	1	0.000847342	0.000847342	0.809922	1	0.193754	0.193754	0.193754	1	0.000841061	0.000841061	0.803918	1	0.290553	0.427245	0.505407	1
21	0.0170099	0.0170099	0.812186	1	0.102816	0.102816	0.18092	1	0.00804787	0.00912405	0.819578	1	0.102816	0.102816	0.18092	1	0.000847342	0.000847342	0.810432	1	0.193754	0.193754	0.193754	1	0.000841019	0.00084102	0.804385	1	0.29192	0.428805	0.506909	1
21.1	0.0170099	0.0170099	0.812707	1	0.102816	0.102816	0.180862	1	0.00808338	0.00912405	0.820098	1	0.102816	0.102816	0.180862	1	0.000847342	0.000847342	0.810943	1	0.193754	0.193754	0.193754	1	0.000840978	0.000840978	0.804853	1	0.293288	0.430365	0.508411	1
21.2	0.0170099	0.0170099	0.813227	1	0.102816	0.102816	0.180804	1	0.00811773	0.00912405	0.820618	1	0.102816	0.102816	0.180804	1	0.000847342	0.000847342	0.811455	1	0.193754	0.193754	0.193754	1	0.000840937	0.000840937	0.805321	1	0.294659	0.431925	0.509913	1
21.3	0.0170099	0.0170099	0.813748	1	0.102816	0.102816	0.180746	1	0.00815093	0.00912405	0.821138	1	0.102816	0.102816	0.180746	1	0.000847342	0.000847342	0.811966	1	0.193754	0.193754	0.193754	1	0.000840896	0.000840896	0.805789	1	0.296032	0.433484	0.511415	1
21.4	0.0170099	0.0170099	0.814269	1	0.102816	0.102816	0.180689	1	0.00818305	0.00931653	0.821852	1	0.102816	0.102816	0.180689	1	0.000847342	0.000847342	0.812478	1	0.193754	0.193754	0.193754	1	0.000840855	0.000840855	0.806258	1	0.297406	0.435044	0.512917	1
21.5	0.0170099	0.0170099	0.814791	1	0.102816	0.102816	0.180631	1	0.00822045	0.00931653	0.822373	1	0.102816	0.102816	0.180631	1	0.000847342	0.000847342	0.812991	1	0.193754	0.193754	0.193754	1	0.000840814	0.000840814	0.806727	1	0.298783	0.436604	0.51442	1
21.6	0.0170099	0.0170099	0.815312	1	0.102816	0.102816	0.180574	1	0.00825662	0.00931653	0.822894	1	0.102816	0.102816	0.180574	1	0.000847342	0.000847342	0.813503	1	0.193754	0.193754	0.193754	1	0.000840773	0.000840773	0.807196	1	0.300161	0.438164	0.515922	1
21.7	0.0170099	0.0170099	0.815835	1	0.102816	0.102816	0.180516	1	0.0082916	0.00931653	0.823416	1	0.102816	0.102816	0.180516	1	0.000847342	0.000847342	0.814016	1	0.193754	0.193754	0.193754	1	0.000840732	0.000840732	0.807666	1	0.301541	0.439723	0.517424	1
21.8	0.0170099	0.0170099	0.816357	1	0.102816	0.102816	0.180459	1	0.00832542	0.00931653	0.823939	1	0.102816	0.102816	0.180459	1	0.000847342	0.000847342	0.814529	1	0.193754	0.193754	0.193754	1	0.000840691	0.000840691	0.808135	1	0.302923	0.441283	0.518926	1
21.9	0.0170099	0.0170099	0.81688	1	0.102816	0.102816	0.180401	1	0.00835813	0.00950901	0.824654	1	0.102816	0.102816	0.180401	1	0.000847342	0.000847342	0.815043	1	0.193754	0.193754	0.193754	1	0.00084065	0.00084065	0.808606	1	0.304306	0.442843	0.520429	1
22	0.0170099	0.0170099	0.817403	1	0.102816	0.102816	0.180344	1	0.00839611	0.00950901	0.825177	1	0.102816	0.102816	0.180344	1	0.000847342	0.000847342	0.815557	1	0.193754	0.193754	0.193754	1	0.000840609	0.000840609	0.809076	1	0.305692	0.444403	0.521931	1
22.1	0.0170099	0.0170099	0.817926	1	0.102816	0.102816	0.180286	1	0.00843283	0.00950901	0.8257	1	0.102816	0.102816	0.180286	1	0.000847342	0.000847342	0.816071	1	0.193754	0.193754	0.193754	1	0.000840568	0.000840568	0.809547	1	0.307079	0.445963	0.523433	1
22.2	0.0170099	0.0170099	0.81845	1	0.102816	0.102816	0.180229	1	0.00846835	0.00950901	0.826224	1	0.102816	0.102816	0.180229	1	0.000847342	0.000847342	0.816586	1	0.193754	0.193754	0.193754	1	0.000840527	0.000840527	0.810018	1	0.308468	0.447522	0.524936	1
22.3	0.0170099	0.0170099	0.818974	1	0.102816	0.102816	0.180172	1	0.00850269	0.00950901	0.826748	1	0.102816	0.102816	0.180172	1	0.000847342	0.000847342	0.8171	1	0.193754	0.193754	0.193754	1	0.000840486	0.000840486	0.810489	1	0.309858	0.449082	0.526438	1
22.4	0.0170099	0.0170099	0.819499	1	0.102816	0.102816	0.180114	1	0.0085359	0.00950901	0.827272	1	0.102816	0.102816	0.180114	1	0.000847342	0.000847342	0.817616	1	0.193754	0.193754	0.193754	1	0.000840445	0.000840446	0.810961	1	0.311251	0.450642	0.527941	1
22.5	0.0170099	0.0170099	0.820024	1	0.102816	0.102816	0.180057	1	0.00856801	0.0097015	0.82799	1	0.102816	0.102816	0.180057	1	0.000847342	0.000847342	0.818131	1	0.193754	0.193754	0.193754	1	0.000840405	0.000840405	0.811433	1	0.312644	0.452202	0.529443	1
22.6	0.0170099	0.0170099	0.820549	1	0.102816	0.102816	0.18	1	0.00860542	0.0097015	0.828515	1	0.102816	0.102816	0.18	1	0.000847342	0.000847342	0.818647	1	0.193754	0.193754	0.193754	1	0.000840364	0.000840364	0.811905	1	0.31404	0.453761	0.530946	1
22.7	0.0170099	0.0170099	0.821074	1	0.102816	0.102816	0.179943	1	0.00864159	0.0097015	0.82904	1	0.102816	0.102816	0.179943	1	0.000847342	0.000847342	0.819163	1	0.193754	0.193754	0.193754	1	0.000840323	0.000840324	0.812378	1	0.315437	0.455321	0.532449	1
22.8	0.0170099	0.0170099	0.8216	1	0.102816	0.102816	0.179886	1	0.00867656	0.0097015	0.829566	1	0.102816	0.102816	0.179886	1	0.000847342	0.000847342	0.81968	1	0.193754	0.193754	0.193754	1	0.000840283	0.000840283	0.812851	1	0.316836	0.456881	0.533951	1
22.9	0.0170099	0.0170099	0.822126	1	0.102816	0.102816	0.179829	1	0.00871039	0.0097015	0.830093	1	0.102816	0.102816	0.179829	1	0.000847342	0.000847342	0.820197	1	0.193754	0.193754	0.193754	1	0.000840242	0.000840242	0.813324	1	0.318237	0.458441	0.535454	1
23	0.0170099	0.0170099	0.822653	1	0.102816	0.102816	0.179772	1	0.00874309	0.00989398	0.830812	1	0.102816	0.102816	0.179772	1	0.000847342	0.000847342	0.820714	1	0.193754	0.193754	0.193754	1	0.000840202	0.000840202	0.813798	1	0.319639	0.46	0.536957	1
23.1	0.0170099	0.0170099	0.823179	1	0.102816	0.102816	0.179715	1	0.00878107	0.00989398	0.831339	1	0.102816	0.102816	0.179715	1	0.000847342	0.000847342	0.821231	1	0.193754	0.193754	0.193754	1	0.000840161	0.000840161	0.814271	1	0.321042	0.46156	0.53846	1
23.2	0.0170099	0.0170099	0.823706	1	0.102816	0.102816	0.179658	1	0.0088178	0.00989398	0.831866	1	0.102816	0.102816	0.179658	1	0.000847342	0.000847342	0.821749	1	0.193754	0.193754	0.193754	1	0.000840121	0.000840121	0.814746	1	0.322447	0.46312	0.539962	1
23.3	0.0170099	0.0170099	0.824234	1	0.102816	0.102816	0.179601	1	0.00885331	0.00989398	0.832394	1	0.102816	0.102816	0.179601	1	0.000847342	0.000847342	0.822267	1	0.193754	0.193754	0.193754	1	0.00084008	0.000840081	0.81522	1	0.323854	0.46468	0.541465	1
23.4	0.0170099	0.0170099	0.824762	1	0.102816	0.102816	0.179544	1	0.00888765	0.00989398	0.832922	1	0.102816	0.102816	0.179544	1	0.000847342	0.000847342	0.822786	1	0.193754	0.193754	0.193754	1	0.00084004	0.00084004	0.815695	1	0.325262	0.466239	0.542968	1
23.5	0.0170099	0.0170099	0.82529	1	0.102816	0.102816	0.179488	1	0.00892086	0.00989398	0.833451	1	0.102816	0.102816	0.179488	1	0.000847342	0.000847342	0.823304	1	0.193754	0.193754	0.193754	1	0.00084	0.00084	0.81617	1	0.326672	0.467799	0.544471	1
23.6	0.0170099	0.0170099	0.825818	1	0.102816	0.102816	0.179431	1	0.00895298	0.0100865	0.834172	1	0.102816	0.102816	0.179431	1	0.000847342	0.000847342	0.823823	1	0.193754	0.193754	0.193754	1	0.000839959	0.00083996	0.816646	1	0.328083	0.469359	0.545974	1
23.7	0.0170099	0.0170099	0.826347	1	0.102816	0.102816	0.179374	1	0.00899038	0.0100865	0.834702	1	0.102816	0.102816	0.179374	1	0.000847342	0.000847342	0.824343	1	0.193754	0.193754	0.193754	1	0.000839919	0.000839919	0.817121	1	0.329496	0.470919	0.547477	1
23.8	0.0170099	0.0170099	0.826876	1	0.102816	0.102816	0.179317	1	0.00902655	0.0100865	0.835231	1	0.102816	0.102816	0.179317	1	0.000847342	0.000847342	0.824863	1	0.193754	0.193754	0.193754	1	0.000839879	0.000839879	0.817598	1	0.33091	0.472478	0.54898	1
23.9	0.0170099	0.0170099	0.827406	1	0.102816	0.102816	0.179261	1	0.00906153	0.0100865	0.835761	1	0.102816	0.102816	0.179261	1	0.000847342	0.000847342	0.825383	1	0.193754	0.193754	0.193754	1	0.000839839	0.000839839	0.818074	1	0.332326	0.474038	0.550484	1
24	0.0170099	0.0170099	0.827935	1	0.102816	0.102816	0.179204	1	0.00909535	0.0100865	0.836292	1	0.102816	0.102816	0.179204	1	0.000847342	0.000847342	0.825903	1	0.193754	0.193754	0.193754	1	0.000839799	0.000839799	0.818551	1	0.333743	0.475598	0.551987	1
24.1	0.0170099	0.0170099	0.828465	1	0.102816	0.102816	0.179148	1	0.00912806	0.0102789	0.837015	1	0.102816	0.102816	0.179148	1	0.000847342	0.000847342	0.826424	1	0.193754	0.193754	0.193754	1	0.000839759	0.000839759	0.819028	1	0.335162	0.477158	0.55349	1
24.2	0.0170099	0.0170099	0.828996	1	0.102816	0.102816	0.179091	1	0.00916604	0.0102789	0.837546	1	0.102816	0.102816	0.179091	1	0.000847342	0.000847342	0.826945	1	0.193754	0.193754	0.193754	1	0.000839719	0.000839719	0.819505	1	0.336582	0.478717	0.554993	1
24.3	0.0170099	0.0170099	0.829527	1	0.102816	0.102816	0.179035	1	0.00920276	0.0102789	0.838078	1	0.102816	0.102816	0.179035	1	0.000847342	0.000847342	0.827466	1	0.193754	0.193754	0.193754	1	0.000839679	0.000839679	0.819983	1	0.338003	0.480277	0.556497	1
24.4	0.0170099	0.0170099	0.830058	1	0.102816	0.102816	0.178978	1	0.00923828	0.0102789	0.83861	1	0.102816	0.102816	0.178978	1	0.000847342	0.000847342	0.827988	1	0.193754	0.193754	0.193754	1	0.000839639	0.00083964	0.820461	1	0.339426	0.481837	0.558	1
24.5	0.0170099	0.0170099	0.830589	1	0.102816	0.102816	0.178922	1	0.00927262	0.0102789	0.839142	1	0.102816	0.102816	0.178922	1	0.000847342	0.000847342	0.82851	1	0.193754	0.193754	0.193754	1	0.0008396	0.0008396	0.82094	1	0.34085	0.483397	0.559503	1
24.6	0.0170099	0.0170099	0.831121	1	0.102816	0.102816	0.178866	1	0.00930583	0.0102789	0.839674	1	0.102816	0.102816	0.178866	1	0.000847342	0.000847342	0.829033	1	0.193754	0.193754	0.193754	1	0.00083956	0.00083956	0.821418	1	0.342275	0.484957	0.561007	1
24.7	0.0170099	0.0170099	0.831653	1	0.102816	0.102816	0.178809	1	0.00933794	0.0104714	0.8404	1	0.102816	0.102816	0.178809	1	0.000847342	0.000847342	0.829555	1	0.193754	0.193754	0.193754	1	0.00083952	0.00083952	0.821897	1	0.343702	0.486516	0.56251	1
24.8	0.0170099	0.0170099	0.832185	1	0.102816	0.102816	0.178753	1	0.00937534	0.0104714	0.840933	1	0.102816	0.102816	0.178753	1	0.000847342	0.000847342	0.830078	1	0.193754	0.193754	0.193754	1	0.000839481	0.000839481	0.822377	1	0.34513	0.488076	0.564014	1
24.9	0.0170099	0.0170099	0.832718	1	0.102816	0.102816	0.178697	1	0.00941151	0.0104714	0.841467	1	0.102816	0.102816	0.178697	1	0.000847342	0.000847342	0.830602	1	0.193754	0.193754	0.193754	1	0.000839441	0.000839441	0.822857	1	0.34656	0.489636	0.565517	1
25	0.0170099	0.0170099	0.833251	1	0.102816	0.102816	0.178641	1	0.00944649	0.0104714	0.842001	1	0.102816	0.102816	0.178641	1	0.000847342	0.000847342	0.831125	1	0.193754	0.193754	0.193754	1	0.000839402	0.000839402	0.823337	1	0.347991	0.491196	0.567021	1
25.1	0.0170099	0.0170099	0.833785	1	0.102816	0.102816	0.178585	1	0.00948031	0.0104714	0.842536	1	0.102816	0.102816	0.178585	1	0.000847342	0.000847342	0.831649	1	0.193754	0.193754	0.193754	1	0.000839362	0.000839362	0.823817	1	0.349423	0.492755	0.568525	1
25.2	0.0170099	0.0170099	0.834319	1	0.102816	0.102816	0.178529	1	0.00951302	0.0106639	0.843263	1	0.102816	0.102816	0.178529	1	0.000847342	0.000847342	0.832174	1	0.193754	0.193754	0.193754	1	0.000839323	0.000839323	0.824298	1	0.350856	0.494315	0.570028	1
25.3	0.0170099	0.0170099	0.834853	1	0.102816	0.102816	0.178473	1	0.009551	0.0106639	0.843799	1	0.102816	0.102816	0.178473	1	0.000847342	0.000847342	0.832698	1	0.193754	0.193754	0.193754	1	0.000839284	0.000839284	0.824779	1	0.35229	0.495875	0.571532	1
25.4	0.0170099	0.0170099	0.835387	1	0.102816	0.102816	0.178417	1	0.00958773	0.0106639	0.844334	1	0.102816	0.102816	0.178417	1	0.000847342	0.000847342	0.833223	1	0.193754	0.193754	0.193754	1	0.000839244	0.000839244	0.82526	1	0.353726	0.497435	0.573036	1
25.5	0.0170099	0.0170099	0.835922	1	0.102816	0.102816	0.178361	1	0.00962324	0.0106639	0.84487	1	0.102816	0.102816	0.178361	1	0.000847342	0.000847342	0.833749	1	0.193754	0.193754	0.193754	1	0.000839205	0.000839205	0.825742	1	0.355163	0.498994	0.57454	1
25.6	0.0170099	0.0170099	0.836457	1	0.102816	0.102816	0.178305	1	0.00965758	0.0106639	0.845407	1	0.102816	0.102816	0.178305	1	0.000847342	0.000847342	0.834274	1	0.193754	0.193754	0.193754	1	0.000839166	0.000839166	0.826224	1	0.356602	0.500554	0.576043	1
25.7	0.0170099	0.0170099	0.836993	1	0.102816	0.102816	0.178249	1	0.00969079	0.0106639	0.845944	1	0.102816	0.102816	0.178249	1	0.000847342	0.000847342	0.834801	1	0.193754	0.193754	0.193754	1	0.000839127	0.000839127	0.826707	1	0.358041	0.502114	0.577547	1
25.8	0.0170099	0.0170099	0.837528	1	0.102816	0.102816	0.178193	1	0.0097229	0.0108564	0.846673	1	0.102816	0.102816	0.178193	1	0.000847342	0.000847342	0.835327	1	0.193754	0.193754	0.193754	1	0.000839088	0.000839088	0.827189	1	0.359482	0.503674	0.579051	1
25.9	0.0170099	0.0170099	0.838065	1	0.102816	0.102816	0.178137	1	0.00976031	0.0108564	0.847211	1	0.102816	0.102816	0.178137	1	0.000847342	0.000847342	0.835854	1	0.193754	0.193754	0.193754	1	0.000839049	0.000839049	0.827673	1	0.360924	0.505233	0.580555	1
26	0.0170099	0.0170099	0.838601	1	0.102816	0.102816	0.178082	1	0.00979648	0.0108564	0.847749	1	0.102816	0.102816	0.178082	1	0.000847342	0.000847342	0.836381	1	0.193754	0.193754	0.193754	1	0.00083901	0.00083901	0.828156	1	0.362367	0.506793	0.582059	1
26.1	0.0170099	0.0170099	0.839138	1	0.102816	0.102816	0.178026	1	0.00983146	0.0108564	0.848287	1	0.102816	0.102816	0.178026	1	0.000847342	0.000847342	0.836908	1	0.193754	0.193754	0.193754	1	0.000838971	0.000838971	0.82864	1	0.363811	0.508353	0.583563	1
26.2	0.0170099	0.0170099	0.839675	1	0.102816	0.102816	0.17797	1	0.00986528	0.0108564	0.848826	1	0.102816	0.102816	0.17797	1	0.000847342	0.000847342	0.837436	1	0.193754	0.193754	0.193754	1	0.000838933	0.000838933	0.829124	1	0.365257	0.509913	0.585067	1
26.3	0.0170099	0.0170099	0.840213	1	0.102816	0.102816	0.177915	1	0.00989798	0.0110489	0.849557	1	0.102816	0.102816	0.177915	1	0.000847342	0.000847342	0.837964	1	0.193754	0.193754	0.193754	1	0.000838894	0.000838894	0.829609	1	0.366703	0.511472	0.586572	1
26.4	0.0170099	0.0170099	0.84075	1	0.102816	0.102816	0.177859	1	0.00993596	0.0110489	0.850097	1	0.102816	0.102816	0.177859	1	0.000847342	0.000847342	0.838492	1	0.193754	0.193754	0.193754	1	0.000838855	0.000838855	0.830093	1	0.368151	0.513032	0.588076	1
26.5	0.0170099	0.0170099	0.841289	1	0.102816	0.102816	0.177804	1	0.00997269	0.0110489	0.850636	1	0.102816	0.102816	0.177804	1	0.000847342	0.000847342	0.839021	1	0.193754	0.193754	0.193754	1	0.000838817	0.000838817	0.830579	1	0.3696	0.514592	0.58958	1
26.6	0.0170099	0.0170099	0.841827	1	0.102816	0.102816	0.177748	1	0.0100082	0.0110489	0.851177	1	0.102816	0.102816	0.177748	1	0.000847342	0.000847342	0.83955	1	0.193754	0.193754	0.193754	1	0.000838778	0.000838778	0.831064	1	0.37105	0.516152	0.591084	1
26.7	0.0170099	0.0170099	0.842366	1	0.102816	0.102816	0.177693	1	0.0100425	0.0110489	0.851717	1	0.102816	0.102816	0.177693	1	0.000847342	0.000847342	0.840079	1	0.193754	0.193754	0.193754	1	0.00083874	0.00083874	0.83155	1	0.372501	0.517711	0.592589	1
26.8	0.0170099	0.0170099	0.842905	1	0.102816	0.102816	0.177637	1	0.0100758	0.0110489	0.852258	1	0.102816	0.102816	0.177637	1	0.000847342	0.000847342	0.840609	1	0.193754	0.193754	0.193754	1	0.000838702	0.000838702	0.832036	1	0.373953	0.519271	0.594093	1
26.9	0.0170099	0.0170099	0.843445	1	0.102816	0.102816	0.177582	1	0.0101079	0.0112413	0.852992	1	0.102816	0.102816	0.177582	1	0.000847342	0.000847342	0.841139	1	0.193754	0.193754	0.193754	1	0.000838663	0.000838663	0.832523	1	0.375406	0.520831	0.595597	1
27	0.0170099	0.0170099	0.843985	1	0.102816	0.102816	0.177527	1	0.0101453	0.0112413	0.853534	1	0.102816	0.102816	0.177527	1	0.000847342	0.000847342	0.841669	1	0.193754	0.193754	0.193754	1	0.000838625	0.000838625	0.83301	1	0.37686	0.522391	0.597102	1
27.1	0.0170099	0.0170099	0.844525	1	0.102816	0.102816	0.177471	1	0.0101814	0.0112413	0.854076	1	0.102816	0.102816	0.177471	1	0.000847342	0.000847342	0.8422	1	0.193754	0.193754	0.193754	1	0.000838587	0.000838587	0.833497	1	0.378316	0.52395	0.598606	1
27.2	0.0170099	0.0170099	0.845065	1	0.102816	0.102816	0.177416	1	0.0102164	0.0112413	0.854618	1	0.102816	0.102816	0.177416	1	0.000847342	0.000847342	0.842731	1	0.193754	0.193754	0.193754	1	0.000838549	0.000838549	0.833985	1	0.379772	0.52551	0.600111	1
27.3	0.0170099	0.0170099	0.845606	1	0.102816	0.102816	0.177361	1	0.0102502	0.0112413	0.855161	1	0.102816	0.102816	0.177361	1	0.000847342	0.000847342	0.843262	1	0.193754	0.193754	0.193754	1	0.000838511	0.000838511	0.834473	1	0.381229	0.52707	0.601615	1
27.4	0.0170099	0.0170099	0.846147	1	0.102816	0.102816	0.177306	1	0.0102829	0.0114338	0.855897	1	0.102816	0.102816	0.177306	1	0.000847342	0.000847342	0.843794	1	0.193754	0.193754	0.193754	1	0.000838473	0.000838473	0.834961	1	0.382688	0.52863	0.60312	1
27.5	0.0170099	0.0170099	0.846689	1	0.102816	0.102816	0.177251	1	0.0103209	0.0114338	0.856441	1	0.102816	0.102816	0.177251	1	0.000847342	0.000847342	0.844326	1	0.193754	0.193754	0.193754	1	0.000838435	0.000838435	0.83545	1	0.384147	0.53019	0.604624	1
27.6	0.0170099	0.0170099	0.847231	1	0.102816	0.102816	0.177195	1	0.0103577	0.0114338	0.856985	1	0.102816	0.102816	0.177195	1	0.000847342	0.000847342	0.844858	1	0.193754	0.193754	0.193754	1	0.000838397	0.000838397	0.835939	1	0.385608	0.531749	0.606129	1
27.7	0.0170099	0.0170099	0.847773	1	0.102816	0.102816	0.17714	1	0.0103932	0.0114338	0.857529	1	0.102816	0.102816	0.17714	1	0.000847342	0.000847342	0.845391	1	0.193754	0.193754	0.193754	1	0.00083836	0.00083836	0.836429	1	0.387069	0.533309	0.607634	1
27.8	0.0170099	0.0170099	0.848316	1	0.102816	0.102816	0.177085	1	0.0104275	0.0114338	0.858074	1	0.102816	0.102816	0.177085	1	0.000847342	0.000847342	0.845924	1	0.193754	0.193754	0.193754	1	0.000838322	0.000838322	0.836919	1	0.388531	0.534869	0.609139	1
27.9	0.0170099	0.0170099	0.848859	1	0.102816	0.102816	0.17703	1	0.0104607	0.0114338	0.858619	1	0.102816	0.102816	0.17703	1	0.000847342	0.000847342	0.846457	1	0.193754	0.193754	0.193754	1	0.000838285	0.000838285	0.837409	1	0.389995	0.536429	0.610643	1
28	0.0170099	0.0170099	0.849402	1	0.102816	0.102816	0.176976	1	0.0104928	0.0116263	0.859357	1	0.102816	0.102816	0.176976	1	0.000847342	0.000847342	0.846991	1	0.193754	0.193754	0.193754	1	0.000838247	0.000838247	0.837899	1	0.391459	0.537988	0.612148	1
28.1	0.0170099	0.0170099	0.849946	1	0.102816	0.102816	0.176921	1	0.0105302	0.0116263	0.859903	1	0.102816	0.102816	0.176921	1	0.000847342	0.000847342	0.847525	1	0.193754	0.193754	0.193754	1	0.00083821	0.00083821	0.83839	1	0.392924	0.539548	0.613653	1
28.2	0.0170099	0.0170099	0.85049	1	0.102816	0.102816	0.176866	1	0.0105664	0.0116263	0.860449	1	0.102816	0.102816	0.176866	1	0.000847342	0.000847342	0.848059	1	0.193754	0.193754	0.193754	1	0.000838172	0.000838172	0.838881	1	0.394391	0.541108	0.615158	1
28.3	0.0170099	0.0170099	0.851034	1	0.102816	0.102816	0.176811	1	0.0106014	0.0116263	0.860996	1	0.102816	0.102816	0.176811	1	0.000847342	0.000847342	0.848594	1	0.193754	0.193754	0.193754	1	0.000838135	0.000838135	0.839373	1	0.395858	0.542668	0.616663	1
28.4	0.0170099	0.0170099	0.851579	1	0.102816	0.102816	0.176756	1	0.0106352	0.0116263	0.861543	1	0.102816	0.102816	0.176756	1	0.000847342	0.000847342	0.849129	1	0.193754	0.193754	0.193754	1	0.000838098	0.000838098	0.839865	1	0.397326	0.544227	0.618168	1
28.5	0.0170099	0.0170099	0.852124	1	0.102816	0.102816	0.176702	1	0.0106679	0.0118188	0.862283	1	0.102816	0.102816	0.176702	1	0.000847342	0.000847342	0.849664	1	0.193754	0.193754	0.193754	1	0.000838061	0.000838061	0.840357	1	0.398795	0.545787	0.619673	1
28.6	0.0170099	0.0170099	0.852669	1	0.102816	0.102816	0.176647	1	0.0107059	0.0118188	0.862831	1	0.102816	0.102816	0.176647	1	0.000847342	0.000847342	0.8502	1	0.193754	0.193754	0.193754	1	0.000838024	0.000838024	0.84085	1	0.400265	0.547347	0.621178	1
28.7	0.0170099	0.0170099	0.853215	1	0.102816	0.102816	0.176592	1	0.0107426	0.0118188	0.863379	1	0.102816	0.102816	0.176592	1	0.000847342	0.000847342	0.850736	1	0.193754	0.193754	0.193754	1	0.000837987	0.000837987	0.841343	1	0.401736	0.548907	0.622683	1
28.8	0.0170099	0.0170099	0.853761	1	0.102816	0.102816	0.176538	1	0.0107781	0.0118188	0.863928	1	0.102816	0.102816	0.176538	1	0.000847342	0.000847342	0.851272	1	0.193754	0.193754	0.193754	1	0.00083795	0.00083795	0.841836	1	0.403207	0.550466	0.624188	1
28.9	0.0170099	0.0170099	0.854307	1	0.102816	0.102816	0.176483	1	0.0108125	0.0118188	0.864477	1	0.102816	0.102816	0.176483	1	0.000847342	0.000847342	0.851809	1	0.193754	0.193754	0.193754	1	0.000837913	0.000837913	0.84233	1	0.40468	0.552026	0.625694	1
29	0.0170099	0.0170099	0.854854	1	0.102816	0.102816	0.176429	1	0.0108457	0.0118188	0.865026	1	0.102816	0.102816	0.176429	1	0.000847342	0.000847342	0.852346	1	0.193754	0.193754	0.193754	1	0.000837877	0.000837877	0.842824	1	0.406153	0.553586	0.627199	1
29.1	0.0170099	0.0170099	0.855401	1	0.102816	0.102816	0.176374	1	0.0108778	0.0120113	0.865768	1	0.102816	0.102816	0.176374	1	0.000847342	0.000847342	0.852884	1	0.193754	0.193754	0.193754	1	0.00083784	0.00083784	0.843319	1	0.407628	0.555146	0.628704	1
29.2	0.0170099	0.0170099	0.855948	1	0.102816	0.102816	0.17632	1	0.0109152	0.0120113	0.866319	1	0.102816	0.102816	0.17632	1	0.000847342	0.000847342	0.853421	1	0.193754	0.193754	0.193754	1	0.000837803	0.000837803	0.843814	1	0.409103	0.556705	0.63021	1
29.3	0.0170099	0.0170099	0.856496	1	0.102816	0.102816	0.176265	1	0.0109514	0.0120113	0.866869	1	0.102816	0.102816	0.176265	1	0.000847342	0.000847342	0.853959	1	0.193754	0.193754	0.193754	1	0.000837767	0.000837767	0.844309	1	0.410579	0.558265	0.631715	1
29.4	0.0170099	0.0170099	0.857044	1	0.102816	0.102816	0.176211	1	0.0109863	0.0120113	0.86742	1	0.102816	0.102816	0.176211	1	0.000847342	0.000847342	0.854498	1	0.193754	0.193754	0.193754	1	0.000837731	0.000837731	0.844805	1	0.412056	0.559825	0.63322	1
29.5	0.0170099	0.0170099	0.857593	1	0.102816	0.102816	0.176157	1	0.0110202	0.0120113	0.867971	1	0.102816	0.102816	0.176157	1	0.000847342	0.000847342	0.855037	1	0.193754	0.193754	0.193754	1	0.000837694	0.000837694	0.845301	1	0.413533	0.561385	0.634726	1
29.6	0.0170099	0.0170099	0.858141	1	0.102816	0.102816	0.176102	1	0.0110529	0.0122038	0.868716	1	0.102816	0.102816	0.176102	1	0.000847342	0.000847342	0.855576	1	0.193754	0.193754	0.193754	1	0.000837658	0.000837658	0.845797	1	0.415012	0.562944	0.636231	1
29.7	0.0170099	0.0170099	0.85869	1	0.102816	0.102816	0.176048	1	0.0110909	0.0122038	0.869268	1	0.102816	0.102816	0.176048	1	0.000847342	0.000847342	0.856115	1	0.193754	0.193754	0.193754	1	0.000837622	0.000837622	0.846294	1	0.416491	0.564504	0.637737	1
29.8	0.0170099	0.0170099	0.85924	1	0.102816	0.102816	0.175994	1	0.0111276	0.0122038	0.86982	1	0.102816	0.102816	0.175994	1	0.000847342	0.000847342	0.856655	1	0.193754	0.193754	0.193754	1	0.000837586	0.000837586	0.846791	1	0.417971	0.566064	0.639242	1
29.9	0.0170099	0.0170099	0.85979	1	0.102816	0.102816	0.17594	1	0.0111631	0.0122038	0.870373	1	0.102816	0.102816	0.17594	1	0.000847342	0.000847342	0.857195	1	0.193754	0.193754	0.193754	1	0.00083755	0.00083755	0.847289	1	0.419452	0.567624	0.640748	1
30	0.0170099	0.0170099	0.86034	1	0.102816	0.102816	0.175886	1	0.0111974	0.0122038	0.870926	1	0.102816	0.102816	0.175886	1	0.000847342	0.000847342	0.857736	1	0.193754	0.193754	0.193754	1	0.000837514	0.000837514	0.847786	1	0.420934	0.569183	0.642254	1
